# Supplementary material for: Use of hormone replacement therapy and risk of breast cancer: nested case-control studies using the QResearch and CPRD databases
Source: PubMed Central journal article supplement (PMC7592147; doi:10.1136/bmj.m3873), 2020-10-28
Supplement: viny053479.ww.pdf [file viny053479.ww.pdf]

# Use of hormone replacement therapy and risk of breast cancer: two nested case-control studies in primary care

## Supplementary tables

|                                                                                                                                                                                                                                                                                                           |    |
|-----------------------------------------------------------------------------------------------------------------------------------------------------------------------------------------------------------------------------------------------------------------------------------------------------------|----|
| eTable 1 Characteristics in cases and controls at least 1 years before the index date across the databases by exposure to HRT .....                                                                                                                                                                       | 3  |
| eTable 2 <b>All cases and controls:</b> Duration of use for different hormones of HRT: number of cases and controls, unadjusted and adjusted odds ratios by database and combined results. ....                                                                                                           | 6  |
| eTable 3 Other medications prescribed for menopausal women by database and combined analysis.....                                                                                                                                                                                                         | 9  |
| eTable 4 <b>All cases and controls:</b> Duration of use for different doses of hormones and types of application by database .....                                                                                                                                                                        | 10 |
| eTable 5 <b>All cases and controls:</b> Gap since the last use of different hormones of HRT by database.....                                                                                                                                                                                              | 14 |
| eTable 6 <b>All cases and controls:</b> Duration of use for different hormones of HRT and tibolone in women with <b>recent (between &gt;1 and &lt;5 years</b> before the index date) and <b>past (5 years or more</b> before the index date)exposures, combined analysis .....                            | 16 |
| eTable 7 <b>All cases and controls:</b> Duration of use for different doses of hormones and types of application in women with <b>recent (between &gt;1 and &lt;5 years</b> before the index date) and <b>past (5 years or more</b> before the index date)exposures, combined analysis.....               | 19 |
| eTable 8 <b>All cases and controls:</b> Duration of use for different hormones of HRT and tibolone in women with <b>recent (between &gt;1 and &lt;2 years</b> before the index date) and <b>past (2 years or more</b> before the index date)exposures, combined analysis .....                            | 23 |
| eTable 9 Duration of use for different hormones of HRT and tibolone in women with <b>recent</b> (between >1 and <5 years ) different exposures by age at the index date .....                                                                                                                             | 27 |
| eTable 10 Duration of use for different hormones of HRT and tibolone in women with <b>past</b> (5 years or more before the index date) different exposures by age at the index date.....                                                                                                                  | 29 |
| eTable 11 Duration of use for different hormones of HRT and tibolone in women with <b>recent</b> (between >1 and <5 years before the index date) different exposures by body-mass categories at 1years before the index date .....                                                                        | 32 |
| eTable 12 Duration of use for different hormones of HRT and tibolone in women with <b>past</b> (5 years or more before the index date) different exposures by body-mass categories at 1 year before the index date .....                                                                                  | 34 |
| eTable 13 <b>All cases and controls with 10 years of records:</b> Duration of use for different hormones of HRT and tibolone in women with <b>recent (between &gt;1 and &lt;5 years</b> before the index date) and <b>past (5 years</b> or more before the index date) exposures, combined analysis ..... | 37 |
| eTable 14 <b>All cases and controls aged 55 and older:</b> Duration of use for different hormones of HRT and tibolone in women with <b>recent (between &gt;1 and &lt;5 years</b> before the index date) and <b>past (5 years or more</b> before the index date)exposures, combined analysis.....          | 40 |
| eTable 15 <b>All cases and controls:</b> Years of use since the first prescription, for different hormones of HRT, by database .....                                                                                                                                                                      | 42 |
| eTable 16 Comparison our results with the recent meta-analysis (Lancet 2019) .....                                                                                                                                                                                                                        | 45 |

## Supplementary figures

|                                                                                                                                                                                                  |    |
|--------------------------------------------------------------------------------------------------------------------------------------------------------------------------------------------------|----|
| eFigure 1 Gap since the last use of oestrogen only, oestrogen-progestogen and tibolone therapies .....                                                                                           | 13 |
| eFigure 3 Exposure to HRT by definition of recency .....                                                                                                                                         | 21 |
| eFigure 4 Duration of exposure to oestrogen-only and oestrogen-progestogen therapies and risks in recent (last use within >1 and <2 years before the index date) and past (≥2 years) users ..... | 22 |
| eFigure 5 Recent (between >1 and <5 years) use of different types of HRT in women of different age .....                                                                                         | 26 |
| eFigure 6 Recent (between >1 and <5 years ) exposure to different types of HRT in women of different body mass index.....                                                                        | 31 |
| eFigure 7 Sensitivity analyses: women with 10 years of records and women 55 years and older .....                                                                                                | 36 |

*eTable 1 Characteristics in cases and controls at least 1 years before the index date across the databases by exposure to HRT*

|                                    | <b>No exposure</b> |                 | <b>Oestrogen only</b> |                 | <b>Combined therapy</b> |                 |
|------------------------------------|--------------------|-----------------|-----------------------|-----------------|-------------------------|-----------------|
|                                    | Cases; % (N)       | Controls; % (N) | Cases; % (N)          | Controls; % (N) | Cases; % (N)            | Controls; % (N) |
| <b>Total</b>                       | 64908              | 315107          | 8860                  | 42799           | 24843                   | 99592           |
| <b>Age in years</b>                |                    |                 |                       |                 |                         |                 |
| age (mean, SE)                     | 63.6 (9.0)         | 63.7 (8.9)      | 63.9 (7.2)            | 63.5 (7.2)      | 62.7 (6.8)              | 62.6 (6.9)      |
| 50 to 59                           | 37.3 (24187)       | 36.4 (114734)   | 29.4 (2609)           | 31.3 (13382)    | 34.6 (8598)             | 35.0 (34808)    |
| 60 to 69                           | 32.3 (20949)       | 33.0 (104036)   | 46.8 (4147)           | 47.2 (20211)    | 48.0 (11919)            | 48.0 (47819)    |
| 70 to 79                           | 30.5 (19772)       | 30.6 (96337)    | 23.7 (2104)           | 21.5 (9206)     | 17.4 (4326)             | 17.0 (16965)    |
| <b>Years of records (mean, SE)</b> | 12.0 (5.6)         | 12.4 (5.5)      | 12.9 (5.7)            | 13.4 (5.5)      | 13.3 (5.6)              | 13.8 (5.5)      |
| <b>Ethnicity</b>                   |                    |                 |                       |                 |                         |                 |
| Recorded                           | 69.2 (44902)       | 67.2 (211682)   | 71.7 (6349)           | 70.4 (30137)    | 72.0 (17879)            | 70.3 (70043)    |
| White or not recorded              | 96.1 (62360)       | 95.5 (301061)   | 97.9 (8675)           | 97.6 (41763)    | 98.2 (24400)            | 97.7 (97315)    |
| <b>Townsend quintile*</b>          |                    |                 |                       |                 |                         |                 |
| Most affluent                      | 24.6 (13311)       | 24.4 (63648)    | 26.7 (1997)           | 26.5 (9386)     | 27.1 (5703)             | 27.4 (22700)    |
| 2                                  | 23.6 (12798)       | 23.4 (60934)    | 24.8 (1854)           | 24.4 (8667)     | 25.1 (5284)             | 24.7 (20504)    |
| 3                                  | 21.2 (11477)       | 21.1 (55099)    | 20.2 (1511)           | 21.0 (7455)     | 20.9 (4389)             | 20.6 (17107)    |
| 4                                  | 17.8 (9645)        | 18.2 (47475)    | 17.0 (1268)           | 17.3 (6138)     | 16.3 (3426)             | 16.5 (13731)    |
| Most deprived                      | 12.7 (6888)        | 13.0 (33794)    | 11.4 (850)            | 10.8 (3822)     | 10.6 (2236)             | 10.8 (8946)     |
| <b>Body mass index</b>             |                    |                 |                       |                 |                         |                 |
| recorded                           | 82.3 (53402)       | 79.8 (251518)   | 87.7 (7770)           | 87.8 (37577)    | 88.0 (21852)            | 88.1 (87782)    |
| mean (SE)                          | 27.9 (5.7)         | 27.5 (5.7)      | 27.9 (5.4)            | 27.7 (5.4)      | 26.9 (5.2)              | 26.8 (5.2)      |
| 15 to 24 kg/m <sup>2</sup>         | 29.0 (18807)       | 30.6 (96492)    | 29.3 (2599)           | 31.0 (13280)    | 36.2 (8998)             | 37.0 (36816)    |
| 25 to 29 kg/m <sup>2</sup>         | 28.3 (18375)       | 27.0 (85234)    | 31.6 (2803)           | 31.6 (13529)    | 30.6 (7600)             | 30.7 (30615)    |
| 30 kg/m <sup>2</sup> and over      | 25.0 (16220)       | 22.1 (69792)    | 26.7 (2368)           | 25.2 (10768)    | 21.1 (5254)             | 20.4 (20351)    |
| <b>Smoking</b>                     |                    |                 |                       |                 |                         |                 |
| recorded                           | 89.4 (58054)       | 86.9 (273892)   | 92.4 (8189)           | 92.4 (39561)    | 92.8 (23058)            | 93.0 (92625)    |

|                                 |              |               |             |              |              |              |
|---------------------------------|--------------|---------------|-------------|--------------|--------------|--------------|
| none                            | 49.2 (31962) | 48.9 (154121) | 45.6 (4038) | 47.1 (20147) | 43.6 (10826) | 44.8 (44631) |
| ex                              | 26.8 (17399) | 24.8 (78050)  | 31.3 (2772) | 29.7 (12708) | 32.3 (8029)  | 31.3 (31220) |
| light (1-9 cigarettes/day)      | 6.4 (4186)   | 6.5 (20567)   | 7.4 (659)   | 7.3 (3129)   | 8.0 (1988)   | 8.0 (7942)   |
| moderate (10-19)                | 4.3 (2801)   | 4.2 (13266)   | 4.9 (435)   | 5.1 (2164)   | 5.3 (1324)   | 5.3 (5274)   |
| heavy (≥20)                     | 2.6 (1706)   | 2.5 (7888)    | 3.2 (285)   | 3.3 (1413)   | 3.6 (891)    | 3.6 (3558)   |
| <b>Alcohol</b>                  |              |               |             |              |              |              |
| recorded                        | 80.6 (52328) | 78.1 (246231) | 85.0 (7534) | 85.1 (36425) | 86.3 (21439) | 86.3 (85993) |
| none                            | 24.0 (15585) | 24.6 (77646)  | 23.2 (2052) | 24.5 (10471) | 18.9 (4688)  | 20.4 (20298) |
| ex-use                          | 5.6 (3624)   | 5.4 (17134)   | 7.3 (648)   | 6.9 (2952)   | 6.6 (1638)   | 6.5 (6487)   |
| trivial (<1units/day)           | 30.2 (19604) | 29.5 (92911)  | 32.9 (2914) | 33.5 (14317) | 33.5 (8333)  | 34.3 (34198) |
| light (1-2)                     | 12.6 (8193)  | 11.6 (36502)  | 13.7 (1212) | 12.9 (5509)  | 16.0 (3978)  | 15.3 (15287) |
| moderate (3-6)                  | 7.3 (4723)   | 6.3 (19816)   | 7.2 (636)   | 6.6 (2841)   | 10.2 (2530)  | 8.7 (8692)   |
| heavy (7-9)                     | 0.6 (384)    | 0.5 (1495)    | 0.6 (51)    | 0.5 (224)    | 0.8 (187)    | 0.7 (713)    |
| very heavy (≥10)                | 0.3 (215)    | 0.2 (727)     | 0.2 (21)    | 0.3 (111)    | 0.3 (85)     | 0.3 (318)    |
| <b>History of other cancers</b> |              |               |             |              |              |              |
| any cancer                      | 3.0 (1919)   | 2.6 (8053)    | 4.5 (400)   | 3.7 (1574)   | 2.9 (726)    | 2.5 (2483)   |
| blood cancer                    | 0.4 (249)    | 0.4 (1118)    | 0.5 (41)    | 0.4 (176)    | 0.6 (142)    | 0.4 (397)    |
| cervical cancer                 | 0.1 (93)     | 0.2 (558)     | 0.7 (64)    | 0.8 (326)    | 0.1 (30)     | 0.2 (168)    |
| colorectal                      | 0.6 (358)    | 0.5 (1550)    | 0.6 (54)    | 0.5 (197)    | 0.4 (109)    | 0.4 (431)    |
| lung cancer                     | 0.1 (60)     | 0.1 (337)     | 0.2 (18)    | 0.2 (69)     | 0.1 (34)     | 0.1 (108)    |
| melanoma                        | 0.5 (305)    | 0.4 (1196)    | 0.8 (69)    | 0.5 (217)    | 0.5 (134)    | 0.5 (477)    |
| ovarian cancer                  | 0.2 (126)    | 0.2 (479)     | 0.5 (43)    | 0.5 (195)    | 0.2 (44)     | 0.1 (137)    |
| uterine cancer                  | 0.3 (168)    | 0.2 (698)     | 0.2 (17)    | 0.2 (75)     | 0.2 (46)     | 0.1 (142)    |
| <b>Chronic conditions</b>       |              |               |             |              |              |              |
| benign breast disease           | 8.0 (5225)   | 5.0 (15776)   | 10.9 (965)  | 7.7 (3281)   | 10.4 (2575)  | 6.9 (6916)   |
| diabetes                        | 7.6 (4962)   | 7.1 (22309)   | 7.2 (639)   | 6.9 (2971)   | 5.1 (1268)   | 5.1 (5087)   |
| mental health disorder          | 0.9 (578)    | 0.8 (2373)    | 0.8 (73)    | 0.7 (316)    | 0.9 (236)    | 0.9 (878)    |
| osteoporosis                    | 3.2 (2065)   | 3.6 (11373)   | 4.4 (389)   | 4.9 (2113)   | 4.4 (1089)   | 5.2 (5154)   |

|                                                |              |               |             |              |              |              |
|------------------------------------------------|--------------|---------------|-------------|--------------|--------------|--------------|
| <b>Other characteristics</b>                   |              |               |             |              |              |              |
| Age at HRT start (mean, SD)                    | n/a          | n/a           | 52.4 (6.4)  | 51.7 (6.5)   | 51.6 (5.4)   | 51.2 (5.4)   |
| younger than 44                                | n/a          | n/a           | 8.7 (773)   | 11.2 (4801)  | 6.9 (1709)   | 8.1 (8033)   |
| 45 to 49                                       | n/a          | n/a           | 25.5 (2255) | 27.4 (11707) | 28.8 (7151)  | 30.5 (30384) |
| 50 to 54                                       | n/a          | n/a           | 33.4 (2960) | 32.1 (13724) | 38.9 (9670)  | 38.4 (38249) |
| 55 to 59                                       | n/a          | n/a           | 18.1 (1607) | 17.4 (7459)  | 17.3 (4291)  | 15.9 (15839) |
| 60 and older                                   | n/a          | n/a           | 14.3 (1265) | 11.9 (5108)  | 8.1 (2022)   | 7.1 (7087)   |
| early menopause                                | 3.0 (1919)   | 3.2 (10194)   | 22.0 (1947) | 23.6 (10103) | 2.4 (596)    | 3.1 (3098)   |
| late menopause                                 | 2.6 (1667)   | 2.3 (7154)    | 4.3 (381)   | 4.2 (1797)   | 4.7 (1179)   | 4.7 (4642)   |
| menopausal symptoms                            | 10.4 (6735)  | 10.3 (32310)  | 25.8 (2283) | 26.0 (11121) | 32.7 (8126)  | 34.1 (33951) |
| mammography scans <sup>#</sup>                 | 33.8 (21971) | 33.4 (105191) | 47.9 (4247) | 46.6 (19948) | 49.1 (12194) | 47.5 (47307) |
| MRI/CT scans <sup>#</sup>                      | 4.5 (2899)   | 4.3 (13452)   | 7.6 (674)   | 7.6 (3262)   | 5.8 (1435)   | 6.1 (6055)   |
| oophorectomy/hysterectomy                      | 15.2 (9865)  | 14.9 (47049)  | 88.6 (7854) | 89.8 (38425) | 12.0 (2982)  | 12.6 (12521) |
| <b>Family history</b>                          |              |               |             |              |              |              |
| any cancer                                     | 7.6 (4956)   | 5.9 (18641)   | 8.1 (714)   | 6.8 (2928)   | 8.3 (2053)   | 6.8 (6818)   |
| breast cancer                                  | 3.8 (2457)   | 2.3 (7349)    | 4.5 (400)   | 3.0 (1275)   | 4.3 (1070)   | 2.9 (2933)   |
| cervical cancer                                | 0.0 (30)     | 0.0 (106)     | 0.0 (2)     | 0.0 (16)     | 0.0 (9)      | 0.0 (41)     |
| osteoporosis                                   | 0.6 (396)    | 0.5 (1730)    | 1.0 (91)    | 1.2 (502)    | 1.5 (381)    | 1.5 (1525)   |
| ovarian cancer                                 | 0.2 (101)    | 0.1 (420)     | 0.2 (16)    | 0.2 (76)     | 0.2 (49)     | 0.2 (154)    |
| uterine cancer                                 | 0.0 (32)     | 0.0 (148)     | 0.1 (6)     | 0.0 (20)     | 0.1 (14)     | 0.0 (33)     |
| <b>Other medications before the index date</b> |              |               |             |              |              |              |
| aspirin                                        | 15.9 (10323) | 15.8 (49685)  | 20.9 (1850) | 20.4 (8722)  | 14.6 (3636)  | 15.4 (15342) |
| non-steroidal anti-inflammatory drugs          | 58.2 (37795) | 57.1 (179988) | 76.3 (6761) | 77.3 (33064) | 72.8 (18078) | 74.2 (73892) |
| contraceptive drugs                            | 14.2 (9191)  | 13.1 (41149)  | 6.5 (574)   | 6.9 (2949)   | 12.5 (3110)  | 13.2 (13126) |
| tamoxifen                                      | 1.1 (684)    | 0.1 (451)     | 0.5 (43)    | 0.2 (92)     | 0.4 (98)     | 0.1 (128)    |
| raloxifene                                     | 0.2 (138)    | 0.2 (779)     | 0.6 (54)    | 0.8 (361)    | 0.8 (200)    | 1.0 (996)    |

\*based on cases and controls with available Townsend data; n/a – not applicable

# based on HES and GP data for QResearch and on GP data for CPRD

*eTable 2 All cases and controls: Duration of use for different hormones of HRT: number of cases and controls, unadjusted and adjusted odds ratios by database and combined results.*

|                                    | QResearch            |                                                 |                                                            | CPRD                 |                                                 |                                                            | Combined                                                   | P-value* |
|------------------------------------|----------------------|-------------------------------------------------|------------------------------------------------------------|----------------------|-------------------------------------------------|------------------------------------------------------------|------------------------------------------------------------|----------|
|                                    | N of cases; controls | Unadjusted odds ratio (95% confidence interval) | Adjusted odds ratio <sup>#</sup> (95% confidence interval) | N of cases; controls | Unadjusted odds ratio (95% confidence interval) | Adjusted odds ratio <sup>#</sup> (95% confidence interval) | Adjusted odds ratio <sup>#</sup> (95% confidence interval) |          |
| <b>Overall use</b>                 |                      |                                                 |                                                            |                      |                                                 |                                                            |                                                            |          |
| HRT                                | 20494; 83576         | 1.19 (1.17 to 1.22) <sup>β</sup>                | 1.21 (1.19 to 1.24) <sup>β</sup>                           | 13209; 58815         | 1.17 (1.14 to 1.20) <sup>β</sup>                | 1.21 (1.18 to 1.25) <sup>β</sup>                           | 1.21 (1.19 to 1.23)                                        | <0.001   |
| Oestrogen only                     | 5126; 24302          | 1.03 (1.00 to 1.06)                             | 1.06 (1.02 to 1.10) <sup>α</sup>                           | 3734; 18497          | 1.05 (1.01 to 1.09)                             | 1.07 (1.02 to 1.12) <sup>α</sup>                           | 1.06 (1.03 to 1.10)                                        | <0.001   |
| Combined therapy                   | 15368; 59274         | 1.27 (1.24 to 1.29) <sup>β</sup>                | 1.26 (1.23 to 1.29) <sup>β</sup>                           | 9475; 40318          | 1.23 (1.19 to 1.26) <sup>β</sup>                | 1.26 (1.23 to 1.30) <sup>β</sup>                           | 1.26 (1.24 to 1.29)                                        | <0.001   |
| <b>Duration of Exposure</b>        |                      |                                                 |                                                            |                      |                                                 |                                                            |                                                            |          |
| <b>HRT</b>                         |                      |                                                 |                                                            |                      |                                                 |                                                            |                                                            |          |
| <1 year                            | 4002; 19353          | 0.99 (0.96 to 1.03)                             | 1.01 (0.98 to 1.05)                                        | 3276; 16114          | 1.05 (1.01 to 1.10)                             | 1.08 (1.04 to 1.13) <sup>β</sup>                           | 1.04 (1.01 to 1.07)                                        | 0.004    |
| 1-2 years                          | 4367; 19337          | 1.09 (1.06 to 1.13) <sup>β</sup>                | 1.11 (1.07 to 1.16) <sup>β</sup>                           | 3258; 14625          | 1.16 (1.11 to 1.21) <sup>β</sup>                | 1.19 (1.14 to 1.25) <sup>β</sup>                           | 1.15 (1.12 to 1.18)                                        | <0.001   |
| 3-4 years                          | 3734; 14793          | 1.23 (1.19 to 1.28) <sup>β</sup>                | 1.26 (1.21 to 1.31) <sup>β</sup>                           | 2243; 9852           | 1.19 (1.13 to 1.25) <sup>β</sup>                | 1.23 (1.17 to 1.29) <sup>β</sup>                           | 1.25 (1.21 to 1.29)                                        | <0.001   |
| 5-9 years                          | 6188; 23180          | 1.32 (1.28 to 1.37) <sup>β</sup>                | 1.37 (1.32 to 1.41) <sup>β</sup>                           | 3315; 13909          | 1.25 (1.20 to 1.31) <sup>β</sup>                | 1.34 (1.28 to 1.40) <sup>β</sup>                           | 1.36 (1.32 to 1.39)                                        | <0.001   |
| 10+ years                          | 2203; 6913           | 1.59 (1.51 to 1.67) <sup>β</sup>                | 1.67 (1.58 to 1.76) <sup>β</sup>                           | 1117; 4315           | 1.37 (1.28 to 1.47) <sup>β</sup>                | 1.52 (1.42 to 1.64) <sup>β</sup>                           | 1.62 (1.55 to 1.69)                                        | <0.001   |
| <b>OESTROGEN ONLY</b>              |                      |                                                 |                                                            |                      |                                                 |                                                            |                                                            |          |
| <1 year                            | 956; 4475            | 1.04 (0.96 to 1.11)                             | 1.07 (0.99 to 1.15)                                        | 914; 4370            | 1.08 (1.00 to 1.16)                             | 1.09 (1.01 to 1.18)                                        | 1.08 (1.02 to 1.14)                                        | 0.005    |
| 1-2 years                          | 987; 4981            | 0.97 (0.90 to 1.04)                             | 1.00 (0.93 to 1.08)                                        | 859; 4282            | 1.04 (0.97 to 1.12)                             | 1.05 (0.97 to 1.14)                                        | 1.02 (0.97 to 1.08)                                        | 0.4      |
| 3-4 years                          | 924; 4236            | 1.07 (0.99 to 1.15)                             | 1.11 (1.03 to 1.20) <sup>α</sup>                           | 617; 3062            | 1.05 (0.96 to 1.15)                             | 1.07 (0.97 to 1.17)                                        | 1.09 (1.03 to 1.16)                                        | 0.003    |
| 5-9 years                          | 1606; 7706           | 1.03 (0.98 to 1.09)                             | 1.08 (1.02 to 1.15)                                        | 988; 4936            | 1.05 (0.98 to 1.13)                             | 1.11 (1.03 to 1.20) <sup>α</sup>                           | 1.09 (1.04 to 1.15)                                        | <0.001   |
| 10+ years                          | 653; 2904            | 1.12 (1.03 to 1.22)                             | 1.19 (1.09 to 1.31) <sup>β</sup>                           | 356; 1847            | 1.02 (0.91 to 1.14)                             | 1.12 (0.99 to 1.26)                                        | 1.17 (1.08 to 1.25)                                        | <0.001   |
| <b>Conjugated equine oestrogen</b> |                      |                                                 |                                                            |                      |                                                 |                                                            |                                                            |          |
| <1 year                            | 710; 3631            | 0.94 (0.86 to 1.02)                             | 0.96 (0.88 to 1.04)                                        | 592; 3094            | 0.98 (0.89 to 1.07)                             | 0.99 (0.90 to 1.09)                                        | 0.97 (0.91 to 1.03)                                        | 0.4      |
| 1-2 years                          | 531; 2808            | 0.91 (0.82 to 1.00)                             | 0.94 (0.85 to 1.03)                                        | 435; 2049            | 1.08 (0.98 to 1.21)                             | 1.08 (0.97 to 1.20)                                        | 1.00 (0.93 to 1.07)                                        | 0.9      |
| 3-4 years                          | 467; 2077            | 1.09 (0.98 to 1.21)                             | 1.12 (1.01 to 1.24)                                        | 283; 1385            | 1.05 (0.92 to 1.19)                             | 1.06 (0.92 to 1.21)                                        | 1.09 (1.01 to 1.19)                                        | 0.03     |
| 5-9 years                          | 730; 3561            | 1.01 (0.93 to 1.10)                             | 1.05 (0.96 to 1.14)                                        | 462; 2234            | 1.07 (0.97 to 1.19)                             | 1.12 (1.01 to 1.25)                                        | 1.07 (1.01 to 1.15)                                        | 0.03     |

|                                |             |                                  |                                  |             |                                  |                                  |                     |        |
|--------------------------------|-------------|----------------------------------|----------------------------------|-------------|----------------------------------|----------------------------------|---------------------|--------|
| 10+ years                      | 242; 1174   | 1.02 (0.89 to 1.18)              | 1.07 (0.93 to 1.23)              | 156; 860    | 0.94 (0.79 to 1.12)              | 1.02 (0.85 to 1.21)              | 1.05 (0.94 to 1.17) | 0.4    |
| <b>Estradiol</b>               |             |                                  |                                  |             |                                  |                                  |                     |        |
| <1 year                        | 835; 4144   | 0.98 (0.91 to 1.06)              | 0.99 (0.91 to 1.07)              | 849; 4268   | 1.02 (0.94 to 1.10)              | 1.01 (0.93 to 1.10)              | 1.00 (0.95 to 1.06) | 1      |
| 1-2 years                      | 762; 3685   | 1.02 (0.94 to 1.10)              | 1.02 (0.94 to 1.11)              | 670; 3328   | 1.03 (0.95 to 1.13)              | 1.03 (0.94 to 1.13)              | 1.03 (0.97 to 1.09) | 0.4    |
| 3-4 years                      | 564; 2675   | 1.04 (0.94 to 1.14)              | 1.05 (0.96 to 1.16)              | 388; 2033   | 0.98 (0.88 to 1.10)              | 0.98 (0.88 to 1.10)              | 1.02 (0.95 to 1.10) | 0.5    |
| 5-9 years                      | 869; 4089   | 1.06 (0.98 to 1.14)              | 1.08 (1.00 to 1.16)              | 523; 2567   | 1.05 (0.96 to 1.16)              | 1.09 (0.99 to 1.21)              | 1.08 (1.02 to 1.15) | 0.01   |
| 10+ years                      | 343; 1383   | 1.24 (1.10 to 1.40) <sup>β</sup> | 1.29 (1.14 to 1.46) <sup>β</sup> | 146; 755    | 1.01 (0.84 to 1.21)              | 1.08 (0.90 to 1.30)              | 1.22 (1.10 to 1.35) | <0.001 |
| <b>OESTROGEN COMBINED with</b> |             |                                  |                                  |             |                                  |                                  |                     |        |
| <b>any progestogen</b>         |             |                                  |                                  |             |                                  |                                  |                     |        |
| <1 year                        | 3050; 14908 | 0.99 (0.95 to 1.03)              | 0.99 (0.95 to 1.03)              | 2362; 11744 | 1.05 (1.00 to 1.10)              | 1.07 (1.02 to 1.12) <sup>α</sup> | 1.02 (0.99 to 1.06) | 0.1    |
| 1-2 years                      | 3380; 14362 | 1.14 (1.10 to 1.19) <sup>β</sup> | 1.14 (1.10 to 1.19) <sup>β</sup> | 2399; 10343 | 1.21 (1.15 to 1.27) <sup>β</sup> | 1.24 (1.18 to 1.30) <sup>β</sup> | 1.18 (1.15 to 1.22) | <0.001 |
| 3-4 years                      | 2811; 10559 | 1.31 (1.25 to 1.36) <sup>β</sup> | 1.31 (1.25 to 1.37) <sup>β</sup> | 1626; 6790  | 1.26 (1.19 to 1.33) <sup>β</sup> | 1.29 (1.21 to 1.36) <sup>β</sup> | 1.30 (1.25 to 1.35) | <0.001 |
| 5-9 years                      | 4583; 15475 | 1.48 (1.42 to 1.53) <sup>β</sup> | 1.49 (1.43 to 1.54) <sup>β</sup> | 2327; 8973  | 1.37 (1.31 to 1.44) <sup>β</sup> | 1.44 (1.36 to 1.51) <sup>β</sup> | 1.47 (1.42 to 1.51) | <0.001 |
| 10+ years                      | 1550; 4010  | 1.94 (1.82 to 2.06) <sup>β</sup> | 1.96 (1.84 to 2.09) <sup>β</sup> | 761; 2468   | 1.65 (1.51 to 1.79) <sup>β</sup> | 1.77 (1.62 to 1.93) <sup>β</sup> | 1.89 (1.80 to 1.99) | <0.001 |
| <b>Medroxyprogesterone</b>     |             |                                  |                                  |             |                                  |                                  |                     |        |
| <1 year                        | 1907; 7851  | 1.01 (0.96 to 1.06)              | 1.01 (0.96 to 1.07)              | 1198; 5166  | 1.07 (1.00 to 1.14)              | 1.08 (1.00 to 1.15)              | 1.04 (0.99 to 1.08) | 0.1    |
| 1-2 years                      | 1282; 4806  | 1.12 (1.05 to 1.19) <sup>β</sup> | 1.11 (1.04 to 1.19) <sup>α</sup> | 766; 2893   | 1.23 (1.13 to 1.33) <sup>β</sup> | 1.24 (1.14 to 1.34) <sup>β</sup> | 1.16 (1.10 to 1.22) | <0.001 |
| 3-4 years                      | 784; 2504   | 1.35 (1.24 to 1.47) <sup>β</sup> | 1.36 (1.25 to 1.48) <sup>β</sup> | 385; 1379   | 1.31 (1.17 to 1.47) <sup>β</sup> | 1.32 (1.17 to 1.48) <sup>β</sup> | 1.35 (1.26 to 1.44) | <0.001 |
| 5-9 years                      | 617; 1836   | 1.50 (1.36 to 1.65) <sup>β</sup> | 1.49 (1.35 to 1.64) <sup>β</sup> | 268; 1009   | 1.27 (1.11 to 1.46) <sup>β</sup> | 1.31 (1.14 to 1.51) <sup>β</sup> | 1.43 (1.32 to 1.55) | <0.001 |
| 10+ years                      | 100; 156    | 2.90 (2.24 to 3.74) <sup>β</sup> | 2.90 (2.24 to 3.76) <sup>β</sup> | 29; 83      | 1.71 (1.12 to 2.62)              | 1.78 (1.16 to 2.74) <sup>α</sup> | 2.55 (2.04 to 3.18) | <0.001 |
| <b>Levonorgestrel</b>          |             |                                  |                                  |             |                                  |                                  |                     |        |
| <1 year                        | 2911; 12407 | 1.02 (0.97 to 1.07)              | 1.02 (0.97 to 1.07)              | 1863; 8809  | 1.00 (0.95 to 1.06)              | 1.02 (0.96 to 1.08)              | 1.02 (0.98 to 1.06) | 0.3    |
| 1-2 years                      | 2321; 8629  | 1.17 (1.11 to 1.23) <sup>β</sup> | 1.16 (1.11 to 1.22) <sup>β</sup> | 1267; 5513  | 1.07 (1.01 to 1.15)              | 1.09 (1.02 to 1.16)              | 1.13 (1.09 to 1.18) | <0.001 |
| 3-4 years                      | 1386; 4924  | 1.24 (1.17 to 1.32) <sup>β</sup> | 1.23 (1.16 to 1.31) <sup>β</sup> | 767; 2952   | 1.22 (1.12 to 1.32) <sup>β</sup> | 1.26 (1.15 to 1.37) <sup>β</sup> | 1.24 (1.18 to 1.30) | <0.001 |
| 5-9 years                      | 1595; 4778  | 1.53 (1.44 to 1.62) <sup>β</sup> | 1.52 (1.44 to 1.62) <sup>β</sup> | 907; 3256   | 1.32 (1.22 to 1.42) <sup>β</sup> | 1.38 (1.27 to 1.49) <sup>β</sup> | 1.47 (1.40 to 1.54) | <0.001 |
| 10+ years                      | 261; 666    | 1.86 (1.61 to 2.16) <sup>β</sup> | 1.89 (1.63 to 2.19) <sup>β</sup> | 162; 519    | 1.54 (1.29 to 1.85) <sup>β</sup> | 1.68 (1.40 to 2.01) <sup>β</sup> | 1.80 (1.61 to 2.02) | <0.001 |
| <b>Norethisterone</b>          |             |                                  |                                  |             |                                  |                                  |                     |        |
| <1 year                        | 3220; 13971 | 1.00 (0.96 to 1.04)              | 1.00 (0.96 to 1.05)              | 2475; 11566 | 1.03 (0.98 to 1.08)              | 1.04 (0.99 to 1.09)              | 1.02 (0.99 to 1.05) | 0.3    |
| 1-2 years                      | 2398; 9538  | 1.11 (1.06 to 1.16) <sup>β</sup> | 1.11 (1.06 to 1.17) <sup>β</sup> | 1544; 6281  | 1.20 (1.13 to 1.27) <sup>β</sup> | 1.22 (1.15 to 1.29) <sup>β</sup> | 1.15 (1.11 to 1.20) | <0.001 |

|                       |            |                                  |                                  |           |                                  |                                  |                     |        |
|-----------------------|------------|----------------------------------|----------------------------------|-----------|----------------------------------|----------------------------------|---------------------|--------|
| 3-4 years             | 1494; 5258 | 1.29 (1.21 to 1.37) <sup>β</sup> | 1.29 (1.21 to 1.37) <sup>β</sup> | 781; 3153 | 1.22 (1.13 to 1.33) <sup>β</sup> | 1.25 (1.15 to 1.36) <sup>β</sup> | 1.27 (1.21 to 1.34) | <0.001 |
| 5-9 years             | 1686; 5346 | 1.47 (1.38 to 1.55) <sup>β</sup> | 1.48 (1.40 to 1.57) <sup>β</sup> | 761; 2561 | 1.49 (1.37 to 1.62) <sup>β</sup> | 1.56 (1.43 to 1.70) <sup>β</sup> | 1.51 (1.43 to 1.58) | <0.001 |
| 10+ years             | 353; 778   | 2.16 (1.90 to 2.45) <sup>β</sup> | 2.21 (1.94 to 2.51) <sup>β</sup> | 122; 370  | 1.67 (1.36 to 2.06) <sup>β</sup> | 1.77 (1.44 to 2.18) <sup>β</sup> | 2.08 (1.86 to 2.32) | <0.001 |
| <b>Dydrogesterone</b> |            |                                  |                                  |           |                                  |                                  |                     |        |
| <1 year               | 932; 3745  | 0.99 (0.92 to 1.07)              | 0.99 (0.92 to 1.07)              | 524; 2406 | 0.96 (0.87 to 1.06)              | 0.97 (0.88 to 1.07)              | 0.98 (0.92 to 1.04) | 0.6    |
| 1-2 years             | 469; 1913  | 1.00 (0.90 to 1.11)              | 1.00 (0.90 to 1.11)              | 228; 1141 | 0.90 (0.78 to 1.04)              | 0.91 (0.78 to 1.05)              | 0.96 (0.89 to 1.05) | 0.4    |
| 3-4 years             | 165; 788   | 0.87 (0.74 to 1.04)              | 0.85 (0.72 to 1.01)              | 74; 381   | 0.89 (0.70 to 1.15)              | 0.93 (0.72 to 1.19)              | 0.88 (0.76 to 1.01) | 0.07   |
| 5-9 years             | 140; 490   | 1.22 (1.01 to 1.48)              | 1.23 (1.02 to 1.49)              | 49; 289   | 0.80 (0.59 to 1.08)              | 0.85 (0.62 to 1.15)              | 1.11 (0.94 to 1.31) | 0.2    |
| 10+ years             | 23; 66     | 1.51 (0.93 to 2.45)              | 1.51 (0.93 to 2.45)              | 10; 27    | 1.81 (0.87 to 3.73)              | 2.07 (1.00 to 4.29)              | 1.66 (1.11 to 2.49) | 0.01   |
| <b>TIBOLONE</b>       |            |                                  |                                  |           |                                  |                                  |                     |        |
| <1 year               | 1260; 5373 | 0.97 (0.91 to 1.04)              | 0.98 (0.92 to 1.04)              | 923; 4512 | 0.93 (0.86 to 1.00)              | 0.93 (0.87 to 1.01)              | 0.96 (0.91 to 1.01) | 0.1    |
| 1-2 years             | 591; 2494  | 1.01 (0.92 to 1.10)              | 1.00 (0.91 to 1.10)              | 422; 1763 | 1.10 (0.99 to 1.22)              | 1.08 (0.97 to 1.20)              | 1.03 (0.96 to 1.11) | 0.4    |
| 3-4 years             | 272; 1233  | 0.98 (0.86 to 1.12)              | 0.96 (0.84 to 1.10)              | 207; 852  | 1.14 (0.98 to 1.33)              | 1.15 (0.98 to 1.34)              | 1.04 (0.94 to 1.15) | 0.5    |
| 5-9 years             | 326; 1242  | 1.19 (1.06 to 1.35) <sup>α</sup> | 1.18 (1.05 to 1.34) <sup>α</sup> | 205; 871  | 1.14 (0.98 to 1.33)              | 1.15 (0.99 to 1.35)              | 1.17 (1.06 to 1.29) | 0.001  |
| 10+ years             | 66; 220    | 1.40 (1.06 to 1.85)              | 1.42 (1.08 to 1.88)              | 36; 167   | 1.08 (0.75 to 1.55)              | 1.13 (0.78 to 1.63)              | 1.31 (1.05 to 1.63) | 0.02   |

<sup>#</sup>Odds ratios are with reference to never-users and based on cases and controls matched by age and practice and adjusted for smoking status, body mass index, family history of cancer, medical conditions and events, other medications and contraceptive drugs.

<sup>α</sup> P-value<0.01; <sup>β</sup> P-value<0.001



eTable 3 Other medications prescribed for menopausal women by database and combined analysis

|                             | QResearch            |                                                 |                                                            | CPRD                 |                                                 |                                                            | Combined                                                   |       |
|-----------------------------|----------------------|-------------------------------------------------|------------------------------------------------------------|----------------------|-------------------------------------------------|------------------------------------------------------------|------------------------------------------------------------|-------|
|                             | N of cases; controls | Unadjusted odds ratio (95% confidence interval) | Adjusted odds ratio <sup>#</sup> (95% confidence interval) | N of cases; controls | Unadjusted odds ratio (95% confidence interval) | Adjusted odds ratio <sup>#</sup> (95% confidence interval) | adjusted odds ratio <sup>#</sup> (95% confidence interval) |       |
| <b>Oestrogen cream</b>      |                      |                                                 |                                                            |                      |                                                 |                                                            |                                                            |       |
| <1 year                     | 4381; 20620          | 0.96 (0.92 to 0.99)                             | 0.96 (0.93 to 0.99)                                        | 1802; 9163           | 0.95 (0.90 to 1.00)                             | 0.94 (0.89 to 1.00)                                        | 0.95 (0.93 to 0.98)                                        | 0.003 |
| 1-2 years                   | 595; 2934            | 0.92 (0.84 to 1.01)                             | 0.93 (0.85 to 1.02)                                        | 189; 951             | 0.95 (0.81 to 1.12)                             | 0.92 (0.79 to 1.09)                                        | 0.93 (0.86 to 1.00)                                        | 0.06  |
| 3+ years                    | 233; 1045            | 1.03 (0.89 to 1.18)                             | 1.03 (0.89 to 1.19)                                        | 51; 269              | 0.91 (0.68 to 1.23)                             | 0.93 (0.69 to 1.26)                                        | 1.01 (0.89 to 1.15)                                        | 0.9   |
| <b>Vaginal preparations</b> |                      |                                                 |                                                            |                      |                                                 |                                                            |                                                            |       |
| <1 year                     | 2485; 11591          | 0.96 (0.91 to 1.00)                             | 0.96 (0.92 to 1.01)                                        | 1605; 8366           | 0.93 (0.88 to 0.98) <sup>a</sup>                | 0.92 (0.87 to 0.97) <sup>a</sup>                           | 0.94 (0.91 to 0.98)                                        | 0.002 |
| 1-2 years                   | 416; 1926            | 0.97 (0.87 to 1.08)                             | 0.96 (0.86 to 1.07)                                        | 247; 1240            | 0.95 (0.83 to 1.09)                             | 0.93 (0.81 to 1.07)                                        | 0.95 (0.87 to 1.04)                                        | 0.2   |
| 3+ years                    | 141; 720             | 0.87 (0.73 to 1.05)                             | 0.89 (0.74 to 1.07)                                        | 113; 445             | 1.21 (0.98 to 1.49)                             | 1.15 (0.93 to 1.43)                                        | 0.99 (0.87 to 1.14)                                        | 0.9   |

<sup>#</sup>Odds ratios are with reference to never-users and based on cases and controls matched by age and practice and adjusted for smoking status, body mass index, family history of cancer, medical conditions and events, other medications and contraceptive drugs.

<sup>a</sup> P-value<0.01; <sup>b</sup> P-value<0.001

eTable 4 All cases and controls: Duration of use for different doses of hormones and types of application by database

|                                    | QResearch               |                                                      | CPRD                    |                                                      | Combined analysis                                   |         |
|------------------------------------|-------------------------|------------------------------------------------------|-------------------------|------------------------------------------------------|-----------------------------------------------------|---------|
|                                    | N of cases;<br>controls | Adjusted odds ratio#<br>(95% confidence<br>interval) | N of cases;<br>controls | Adjusted odds ratio#<br>(95% confidence<br>interval) | Combined odds ratio<br>(95% confidence<br>interval) | P-value |
| <b>OESTROGEN ONLY</b>              |                         |                                                      |                         |                                                      |                                                     |         |
| <b>Conjugated equine oestrogen</b> |                         |                                                      |                         |                                                      |                                                     |         |
| <b>≤0.625mg</b>                    |                         |                                                      |                         |                                                      |                                                     |         |
| <1 year                            | 580; 2841               | 1.01 (0.92 to 1.11)                                  | 411; 2282               | 0.94 (0.84 to 1.05)                                  | 0.98 (0.91 to 1.05)                                 | 0.5     |
| 1-2 years                          | 394; 2054               | 0.97 (0.87 to 1.08)                                  | 301; 1390               | 1.12 (0.98 to 1.28)                                  | 1.03 (0.95 to 1.12)                                 | 0.5     |
| 3-4 years                          | 331; 1468               | 1.14 (1.01 to 1.28)                                  | 198; 892                | 1.16 (0.99 to 1.36)                                  | 1.15 (1.04 to 1.26)                                 | 0.006   |
| 5-9 years                          | 493; 2446               | 1.04 (0.94 to 1.15)                                  | 307; 1431               | 1.17 (1.03 to 1.33)                                  | 1.09 (1.01 to 1.18)                                 | 0.03    |
| 10+ years                          | 125; 718                | 0.90 (0.74 to 1.09)                                  | 100; 510                | 1.10 (0.88 to 1.37)                                  | 0.98 (0.85 to 1.14)                                 | 0.8     |
| <b>&gt;0.625mg</b>                 |                         |                                                      |                         |                                                      |                                                     |         |
| <1 year                            | 130; 790                | 0.80 (0.66 to 0.96)                                  | 181; 812                | 1.17 (0.99 to 1.38)                                  | 0.99 (0.87 to 1.12)                                 | 0.9     |
| 1-2 years                          | 137; 754                | 0.90 (0.75 to 1.08)                                  | 134; 659                | 1.03 (0.85 to 1.25)                                  | 0.96 (0.84 to 1.10)                                 | 0.6     |
| 3-4 years                          | 136; 609                | 1.11 (0.92 to 1.34)                                  | 85; 493                 | 0.92 (0.73 to 1.17)                                  | 1.03 (0.89 to 1.20)                                 | 0.7     |
| 5-9 years                          | 237; 1115               | 1.09 (0.95 to 1.26)                                  | 155; 803                | 1.08 (0.91 to 1.29)                                  | 1.09 (0.97 to 1.22)                                 | 0.1     |
| 10+ years                          | 117; 456                | 1.37 (1.11 to 1.69) <sup>a</sup>                     | 56; 350                 | 0.93 (0.70 to 1.24)                                  | 1.20 (1.01 to 1.42)                                 | 0.03    |
| <b>Estradiol</b>                   |                         |                                                      |                         |                                                      |                                                     |         |
| <b>≤1mg</b>                        |                         |                                                      |                         |                                                      |                                                     |         |
| <1 year                            | 725; 3552               | 1.01 (0.93 to 1.10)                                  | 727; 3558               | 1.06 (0.97 to 1.15)                                  | 1.04 (0.98 to 1.10)                                 | 0.3     |
| 1-2 years                          | 611; 2915               | 1.06 (0.96 to 1.16)                                  | 511; 2584               | 1.04 (0.94 to 1.15)                                  | 1.05 (0.98 to 1.12)                                 | 0.2     |
| 3-4 years                          | 422; 2012               | 1.06 (0.95 to 1.18)                                  | 295; 1477               | 1.05 (0.93 to 1.20)                                  | 1.06 (0.97 to 1.15)                                 | 0.2     |
| 5-9 years                          | 648; 3041               | 1.10 (1.00 to 1.20)                                  | 377; 1800               | 1.14 (1.01 to 1.28)                                  | 1.11 (1.03 to 1.19)                                 | 0.004   |
| 10+ years                          | 250; 957                | 1.39 (1.20 to 1.60) <sup>b</sup>                     | 86; 540                 | 0.90 (0.72 to 1.14)                                  | 1.23 (1.09 to 1.39)                                 | <0.001  |

|                                |             |                                  |            |                                  |                     |        |
|--------------------------------|-------------|----------------------------------|------------|----------------------------------|---------------------|--------|
| <b>&gt;1mg</b>                 |             |                                  |            |                                  |                     |        |
| <1 year                        | 110; 592    | 0.89 (0.72 to 1.09)              | 122; 710   | 0.89 (0.73 to 1.08)              | 0.89 (0.77 to 1.02) | 0.1    |
| 1-2 years                      | 151; 768    | 0.96 (0.80 to 1.15)              | 159; 744   | 1.07 (0.90 to 1.28)              | 1.01 (0.89 to 1.15) | 0.8    |
| 3-4 years                      | 142; 663    | 1.09 (0.91 to 1.31)              | 93; 556    | 0.87 (0.70 to 1.09)              | 1.00 (0.86 to 1.15) | 1      |
| 5-9 years                      | 221; 1048   | 1.09 (0.94 to 1.26)              | 146; 767   | 1.06 (0.88 to 1.27)              | 1.08 (0.96 to 1.21) | 0.2    |
| 10+ years                      | 93; 426     | 1.16 (0.93 to 1.46)              | 60; 215    | 1.58 (1.18 to 2.12) <sup>a</sup> | 1.31 (1.09 to 1.56) | 0.004  |
| <b>oral</b>                    |             |                                  |            |                                  |                     |        |
| <1 year                        | 556; 2699   | 1.00 (0.91 to 1.11)              | 484; 2353  | 1.07 (0.97 to 1.19)              | 1.03 (0.96 to 1.11) | 0.3    |
| 1-2 years                      | 365; 1730   | 1.02 (0.91 to 1.15)              | 292; 1374  | 1.08 (0.94 to 1.23)              | 1.05 (0.96 to 1.14) | 0.3    |
| 3-4 years                      | 220; 1115   | 0.99 (0.85 to 1.15)              | 158; 835   | 0.97 (0.82 to 1.16)              | 0.98 (0.88 to 1.10) | 0.8    |
| 5-9 years                      | 293; 1451   | 1.01 (0.89 to 1.15)              | 171; 976   | 0.94 (0.79 to 1.11)              | 0.98 (0.89 to 1.09) | 0.7    |
| 10+ years                      | 80; 371     | 1.13 (0.88 to 1.44)              | 60; 243    | 1.35 (1.01 to 1.81)              | 1.22 (1.01 to 1.47) | 0.04   |
| <b>transdermal</b>             |             |                                  |            |                                  |                     |        |
| <1 year                        | 634; 3246   | 0.96 (0.88 to 1.05)              | 719; 3710  | 0.97 (0.89 to 1.06)              | 0.97 (0.91 to 1.03) | 0.3    |
| 1-2 years                      | 546; 2627   | 1.03 (0.94 to 1.14)              | 450; 2379  | 0.97 (0.87 to 1.08)              | 1.00 (0.93 to 1.08) | 0.9    |
| 3-4 years                      | 361; 1679   | 1.08 (0.96 to 1.21)              | 242; 1234  | 1.01 (0.87 to 1.16)              | 1.05 (0.96 to 1.15) | 0.3    |
| 5-9 years                      | 571; 2540   | 1.14 (1.04 to 1.25) <sup>a</sup> | 338; 1508  | 1.20 (1.06 to 1.35) <sup>a</sup> | 1.16 (1.08 to 1.25) | <0.001 |
| 10+ years                      | 238; 919    | 1.35 (1.16 to 1.56) <sup>b</sup> | 73; 460    | 0.88 (0.69 to 1.14)              | 1.21 (1.07 to 1.38) | 0.003  |
| <b>OESTROGEN COMBINED with</b> |             |                                  |            |                                  |                     |        |
| <b>Levonorgestrel</b>          |             |                                  |            |                                  |                     |        |
| <b>oral</b>                    |             |                                  |            |                                  |                     |        |
| <1 year                        | 2796; 12008 | 1.01 (0.97 to 1.06)              | 1796; 8612 | 1.01 (0.95 to 1.07)              | 1.01 (0.98 to 1.05) | 0.6    |
| 1-2 years                      | 2170; 8158  | 1.15 (1.10 to 1.21) <sup>b</sup> | 1225; 5321 | 1.09 (1.02 to 1.17)              | 1.13 (1.08 to 1.18) | <0.001 |
| 3-4 years                      | 1292; 4549  | 1.25 (1.17 to 1.34) <sup>b</sup> | 715; 2771  | 1.25 (1.15 to 1.37) <sup>b</sup> | 1.25 (1.19 to 1.32) | <0.001 |
| 5-9 years                      | 1531; 4590  | 1.53 (1.43 to 1.62) <sup>b</sup> | 878; 3128  | 1.39 (1.28 to 1.50) <sup>b</sup> | 1.47 (1.40 to 1.55) | <0.001 |
| 10+ years                      | 252; 647    | 1.88 (1.62 to 2.18) <sup>b</sup> | 159; 504   | 1.70 (1.41 to 2.04) <sup>b</sup> | 1.80 (1.61 to 2.02) | <0.001 |
| <b>transdermal</b>             |             |                                  |            |                                  |                     |        |
| <1 year                        | 212; 835    | 1.03 (0.88 to 1.21)              | 94; 341    | 1.26 (1.00 to 1.59)              | 1.10 (0.96 to 1.25) | 0.2    |
| 1-2 years                      | 98; 273     | 1.47 (1.16 to 1.86) <sup>a</sup> | 13; 66     | 0.93 (0.51 to 1.69)              | 1.38 (1.11 to 1.72) | 0.004  |

|                                    |             |                                  |             |                                  |                     |        |
|------------------------------------|-------------|----------------------------------|-------------|----------------------------------|---------------------|--------|
| 3 years or more                    | 42; 124     | 1.45 (1.01 to 2.07)              | 6; 17       | 1.75 (0.68 to 4.47)              | 1.48 (1.06 to 2.07) | 0.02   |
| <b><i>intra-uterine device</i></b> | 231; 726    | 1.21 (1.04 to 1.41)              | 141; 559    | 1.11 (0.91 to 1.34)              | 1.17 (1.04 to 1.32) | 0.01   |
| <b>Norethisterone</b>              |             |                                  |             |                                  |                     |        |
| <b><i>oral</i></b>                 |             |                                  |             |                                  |                     |        |
| <1 year                            | 3019; 13097 | 0.99 (0.95 to 1.03)              | 2231; 10436 | 1.03 (0.97 to 1.08)              | 1.00 (0.97 to 1.04) | 0.8    |
| 1-2 years                          | 2000; 7626  | 1.15 (1.09 to 1.21) <sup>β</sup> | 1268; 5158  | 1.20 (1.12 to 1.28) <sup>β</sup> | 1.17 (1.12 to 1.22) | <0.001 |
| 3-4 years                          | 1221; 4248  | 1.29 (1.21 to 1.38) <sup>β</sup> | 675; 2684   | 1.27 (1.16 to 1.38) <sup>β</sup> | 1.28 (1.21 to 1.35) | <0.001 |
| 5-9 years                          | 1324; 3975  | 1.56 (1.46 to 1.67) <sup>β</sup> | 672; 2184   | 1.60 (1.46 to 1.76) <sup>β</sup> | 1.58 (1.49 to 1.66) | <0.001 |
| 10+ years                          | 240; 514    | 2.23 (1.91 to 2.61) <sup>β</sup> | 101; 306    | 1.77 (1.40 to 2.23) <sup>β</sup> | 2.07 (1.82 to 2.36) | <0.001 |
| <b><i>transdermal</i></b>          |             |                                  |             |                                  |                     |        |
| <1 year                            | 1160; 4686  | 1.01 (0.94 to 1.08)              | 821; 3944   | 0.95 (0.88 to 1.03)              | 0.99 (0.94 to 1.04) | 0.6    |
| 1-2 years                          | 689; 2860   | 1.01 (0.93 to 1.11)              | 333; 1330   | 1.19 (1.05 to 1.35) <sup>α</sup> | 1.07 (1.00 to 1.15) | 0.07   |
| 3-4 years                          | 283; 1085   | 1.14 (0.99 to 1.30)              | 107; 436    | 1.17 (0.94 to 1.45)              | 1.15 (1.02 to 1.28) | 0.02   |
| 5-9 years                          | 309; 1107   | 1.28 (1.12 to 1.45) <sup>β</sup> | 77; 286     | 1.39 (1.07 to 1.80)              | 1.30 (1.16 to 1.46) | <0.001 |
| 10+ years                          | 83; 181     | 2.24 (1.72 to 2.92) <sup>β</sup> | 6; 31       | 0.92 (0.38 to 2.23)              | 2.09 (1.62 to 2.69) | <0.001 |

#Odds ratios are with reference to never-users and based on cases and controls matched by age and practice and adjusted for smoking status, body mass index, family history of cancer, medical conditions and events, other medications and contraceptive drugs.

<sup>α</sup> P-value<0.01; <sup>β</sup> P-value<0.001

eFigure 1 Gap since the last use of oestrogen only, oestrogen-progestogen and tibolone therapies

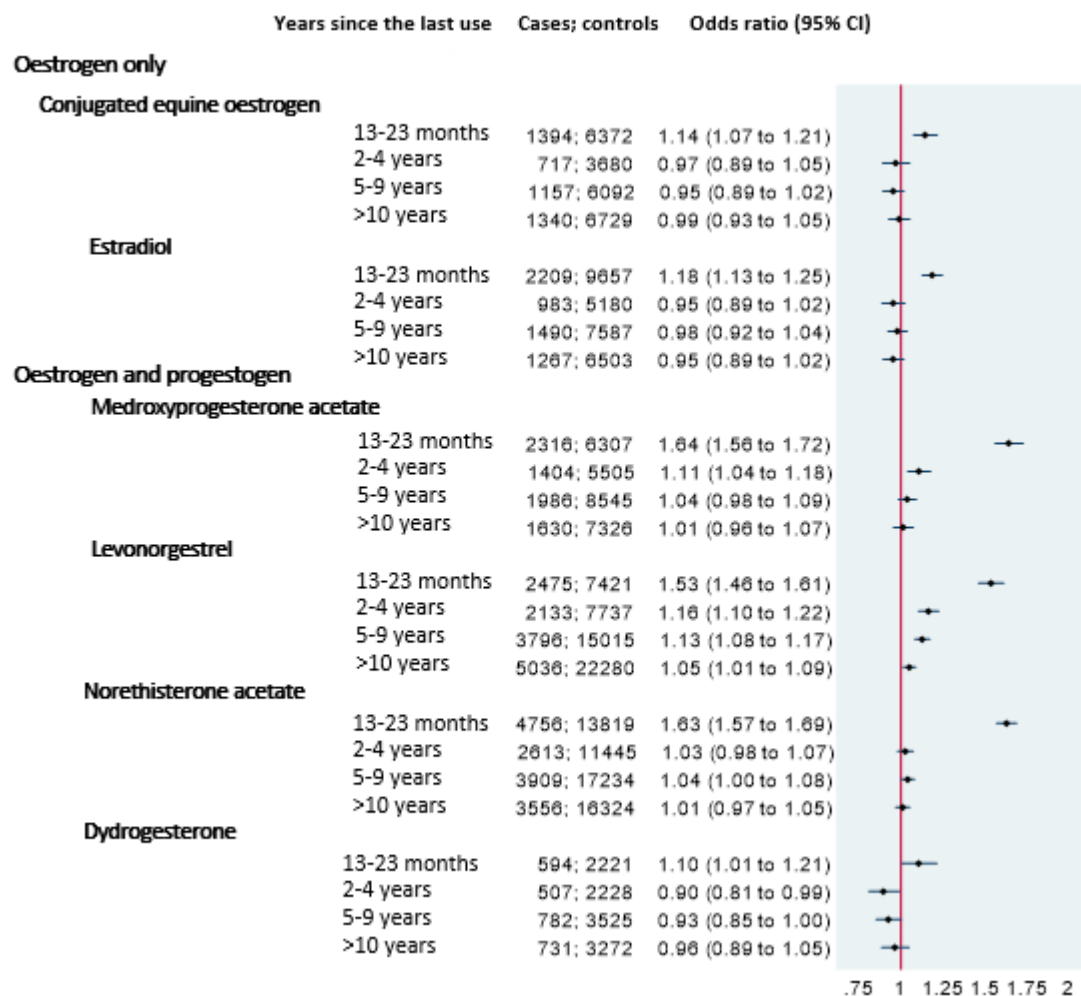

Odds ratios are with reference to never-users and adjusted for smoking, alcohol consumption, Townsend quintile (QResearch only), body mass index, ethnicity, history of other cancers, oophorectomy/hysterectomy, records of menopause, scans, comorbidities, other medications, years of data. Cases are matched to controls by age, general practice and index date.

eTable 5 All cases and controls: Gap since the last use of different hormones of HRT by database.

|                                                    | QResearch               |                                                                  | CPRD                    |                                                                  | Combined analysis                                   |         |
|----------------------------------------------------|-------------------------|------------------------------------------------------------------|-------------------------|------------------------------------------------------------------|-----------------------------------------------------|---------|
|                                                    | N of cases;<br>controls | Adjusted odds ratio <sup>#</sup><br>(95% confidence<br>interval) | N of cases;<br>controls | Adjusted odds ratio <sup>#</sup><br>(95% confidence<br>interval) | Combined odds ratio<br>(95% confidence<br>interval) | P-value |
| <b>HRT</b>                                         |                         |                                                                  |                         |                                                                  |                                                     |         |
| 13-23 months                                       | 8304; 27776             | 1.53 (1.48 to 1.58) <sup>β</sup>                                 | 5159; 17196             | 1.70 (1.63 to 1.76) <sup>β</sup>                                 | 1.59 (1.55 to 1.63)                                 | <0.001  |
| 2-4 years                                          | 3270; 15451             | 1.05 (1.00 to 1.09)                                              | 2146; 10508             | 1.10 (1.05 to 1.16) <sup>β</sup>                                 | 1.07 (1.03 to 1.10)                                 | <0.001  |
| 5-9 years                                          | 4718; 21883             | 1.05 (1.01 to 1.09)                                              | 3210; 16348             | 1.03 (0.98 to 1.07)                                              | 1.04 (1.01 to 1.07)                                 | 0.006   |
| 10+ years                                          | 4202; 18466             | 1.07 (1.03 to 1.12) <sup>β</sup>                                 | 2694; 14763             | 0.93 (0.89 to 0.98) <sup>α</sup>                                 | 1.01 (0.98 to 1.05)                                 | 0.4     |
| <b>OESTROGEN ONLY</b>                              |                         |                                                                  |                         |                                                                  |                                                     |         |
| 13-23 months                                       | 2072; 9332              | 1.16 (1.09 to 1.22) <sup>β</sup>                                 | 1458; 6342              | 1.26 (1.18 to 1.35) <sup>β</sup>                                 | 1.19 (1.15 to 1.25)                                 | <0.001  |
| 2-4 years                                          | 804; 4370               | 0.92 (0.85 to 1.00)                                              | 643; 3185               | 1.07 (0.97 to 1.17)                                              | 0.98 (0.92 to 1.04)                                 | 0.5     |
| 5-9 years                                          | 1235; 5964              | 1.02 (0.96 to 1.09)                                              | 897; 4937               | 0.94 (0.87 to 1.02)                                              | 0.99 (0.94 to 1.04)                                 | 0.6     |
| 10+ years                                          | 1015; 4636              | 1.05 (0.97 to 1.13)                                              | 736; 4033               | 0.93 (0.85 to 1.01)                                              | 1.00 (0.94 to 1.05)                                 | 0.9     |
| <b>Conjugated equine oestrogen</b>                 |                         |                                                                  |                         |                                                                  |                                                     |         |
| 13-23 months                                       | 833; 3910               | 1.09 (1.01 to 1.18)                                              | 561; 2462               | 1.22 (1.11 to 1.35) <sup>β</sup>                                 | 1.14 (1.07 to 1.21)                                 | <0.001  |
| 2-4 years                                          | 419; 2216               | 0.93 (0.83 to 1.03)                                              | 298; 1464               | 1.03 (0.90 to 1.17)                                              | 0.97 (0.89 to 1.05)                                 | 0.4     |
| 5-9 years                                          | 674; 3463               | 0.96 (0.88 to 1.04)                                              | 483; 2629               | 0.95 (0.86 to 1.05)                                              | 0.95 (0.89 to 1.02)                                 | 0.2     |
| 10+ years                                          | 754; 3662               | 0.98 (0.90 to 1.07)                                              | 586; 3067               | 1.00 (0.90 to 1.10)                                              | 0.99 (0.93 to 1.05)                                 | 0.7     |
| <b>Estradiol</b>                                   |                         |                                                                  |                         |                                                                  |                                                     |         |
| 13-23 months                                       | 1277; 5641              | 1.16 (1.08 to 1.23) <sup>β</sup>                                 | 932; 4016               | 1.23 (1.14 to 1.33) <sup>β</sup>                                 | 1.18 (1.13 to 1.25)                                 | <0.001  |
| 2-4 years                                          | 527; 2934               | 0.89 (0.81 to 0.98)                                              | 456; 2246               | 1.04 (0.94 to 1.16)                                              | 0.95 (0.89 to 1.02)                                 | 0.2     |
| 5-9 years                                          | 849; 4027               | 1.03 (0.95 to 1.12)                                              | 641; 3560               | 0.91 (0.83 to 1.00)                                              | 0.98 (0.92 to 1.04)                                 | 0.5     |
| 10+ years                                          | 720; 3374               | 1.02 (0.93 to 1.11)                                              | 547; 3129               | 0.87 (0.79 to 0.96) <sup>α</sup>                                 | 0.95 (0.89 to 1.02)                                 | 0.2     |
| <b>OESTROGEN COMBINED with<br/>any progestogen</b> |                         |                                                                  |                         |                                                                  |                                                     |         |
| 13-23 months                                       | 6234; 18453             | 1.69 (1.64 to 1.75) <sup>β</sup>                                 | 3701; 10854             | 1.91 (1.83 to 2.00) <sup>β</sup>                                 | 1.77 (1.73 to 1.82)                                 | <0.001  |
| 2-4 years                                          | 2467; 11088             | 1.09 (1.04 to 1.14) <sup>β</sup>                                 | 1503; 7323              | 1.10 (1.03 to 1.16) <sup>α</sup>                                 | 1.09 (1.05 to 1.13)                                 | <0.001  |

|                            |             |                                  |             |                                  |                     |        |
|----------------------------|-------------|----------------------------------|-------------|----------------------------------|---------------------|--------|
| 5-9 years                  | 3486; 15928 | 1.05 (1.01 to 1.09)              | 2313; 11411 | 1.05 (1.00 to 1.10)              | 1.05 (1.01 to 1.08) | 0.004  |
| 10+ years                  | 3187; 13845 | 1.07 (1.02 to 1.12) <sup>a</sup> | 1958; 10730 | 0.92 (0.87 to 0.97) <sup>a</sup> | 1.01 (0.97 to 1.05) | 0.6    |
| <b>Medroxyprogesterone</b> |             |                                  |             |                                  |                     |        |
| 13-23 months               | 1499; 4049  | 1.60 (1.50 to 1.70) <sup>b</sup> | 817; 2258   | 1.72 (1.58 to 1.87) <sup>b</sup> | 1.64 (1.56 to 1.72) | <0.001 |
| 2-4 years                  | 884; 3506   | 1.06 (0.98 to 1.15)              | 520; 1999   | 1.18 (1.07 to 1.31) <sup>a</sup> | 1.11 (1.04 to 1.18) | 0.001  |
| 5-9 years                  | 1251; 5192  | 1.03 (0.97 to 1.10)              | 735; 3353   | 1.05 (0.96 to 1.14)              | 1.04 (0.98 to 1.09) | 0.2    |
| 10+ years                  | 1056; 4406  | 1.02 (0.95 to 1.10)              | 574; 2920   | 1.00 (0.90 to 1.10)              | 1.01 (0.96 to 1.07) | 0.7    |
| <b>Levonorgestrel</b>      |             |                                  |             |                                  |                     |        |
| 13-23 months               | 1626; 4954  | 1.44 (1.36 to 1.53) <sup>b</sup> | 849; 2467   | 1.73 (1.59 to 1.88) <sup>b</sup> | 1.53 (1.46 to 1.61) | <0.001 |
| 2-4 years                  | 1420; 5064  | 1.16 (1.08 to 1.23) <sup>b</sup> | 713; 2673   | 1.18 (1.08 to 1.28) <sup>b</sup> | 1.16 (1.10 to 1.22) | <0.001 |
| 5-9 years                  | 2371; 9151  | 1.12 (1.07 to 1.18) <sup>b</sup> | 1425; 5864  | 1.13 (1.06 to 1.21) <sup>b</sup> | 1.13 (1.08 to 1.17) | <0.001 |
| 10+ years                  | 3057; 12235 | 1.11 (1.06 to 1.17) <sup>b</sup> | 1979; 10045 | 0.96 (0.91 to 1.02)              | 1.05 (1.01 to 1.09) | 0.009  |
| <b>Norethisterone</b>      |             |                                  |             |                                  |                     |        |
| 13-23 months               | 2955; 8677  | 1.54 (1.47 to 1.61) <sup>b</sup> | 1801; 5142  | 1.78 (1.67 to 1.88) <sup>b</sup> | 1.63 (1.57 to 1.69) | <0.001 |
| 2-4 years                  | 1615; 6825  | 1.02 (0.96 to 1.08)              | 998; 4620   | 1.03 (0.96 to 1.11)              | 1.03 (0.98 to 1.07) | 0.3    |
| 5-9 years                  | 2354; 10044 | 1.03 (0.98 to 1.08)              | 1555; 7190  | 1.05 (0.99 to 1.12)              | 1.04 (1.00 to 1.08) | 0.05   |
| 10+ years                  | 2227; 9345  | 1.05 (0.99 to 1.11)              | 1329; 6979  | 0.95 (0.89 to 1.02)              | 1.01 (0.97 to 1.05) | 0.6    |
| <b>Dydrogesterone</b>      |             |                                  |             |                                  |                     |        |
| 13-23 months               | 390; 1435   | 1.09 (0.97 to 1.23)              | 204; 786    | 1.13 (0.96 to 1.33)              | 1.10 (1.01 to 1.21) | 0.04   |
| 2-4 years                  | 328; 1414   | 0.88 (0.77 to 0.99)              | 179; 814    | 0.93 (0.79 to 1.10)              | 0.90 (0.81 to 0.99) | 0.03   |
| 5-9 years                  | 506; 2100   | 0.96 (0.87 to 1.06)              | 276; 1425   | 0.87 (0.76 to 1.00)              | 0.93 (0.85 to 1.00) | 0.06   |
| 10+ years                  | 505; 2053   | 1.00 (0.90 to 1.11)              | 226; 1219   | 0.89 (0.76 to 1.03)              | 0.96 (0.89 to 1.05) | 0.4    |
| <b>TIBOLONE</b>            |             |                                  |             |                                  |                     |        |
| 13-23 months               | 648; 2476   | 1.14 (1.04 to 1.25) <sup>a</sup> | 463; 1585   | 1.37 (1.23 to 1.52) <sup>b</sup> | 1.23 (1.15 to 1.32) | <0.001 |
| 2-4 years                  | 468; 1994   | 1.00 (0.90 to 1.11)              | 316; 1544   | 0.93 (0.82 to 1.05)              | 0.97 (0.89 to 1.05) | 0.4    |
| 5-9 years                  | 756; 3220   | 1.01 (0.93 to 1.10)              | 527; 2556   | 0.97 (0.88 to 1.07)              | 0.99 (0.93 to 1.06) | 0.9    |
| 10+ years                  | 643; 2872   | 0.96 (0.88 to 1.05)              | 487; 2480   | 0.99 (0.89 to 1.10)              | 0.97 (0.91 to 1.04) | 0.4    |

<sup>a</sup>Odds ratios are with reference to never-users and based on cases and controls matched by age and practice and adjusted for smoking status, body mass index, family history of cancer, medical conditions and events, other medications and contraceptive drugs.; <sup>a</sup> P-value<0.01; <sup>b</sup> P-value<0.001

eTable 6 All cases and controls: Duration of use for different hormones of HRT and tibolone in women with recent (between >1 and <5 years before the index date) and past (5 years or more before the index date) exposures, combined analysis

|                                    | Recent use (between >1 and <5 years ) |                                         |                                                               | Past use (5 years or more) |                                         |                                                               |
|------------------------------------|---------------------------------------|-----------------------------------------|---------------------------------------------------------------|----------------------------|-----------------------------------------|---------------------------------------------------------------|
|                                    | N of cases;<br>controls               | Mean<br>duration:<br>cases;<br>controls | Combined odds ratio <sup>#</sup><br>(95% confidence interval) | N of cases;<br>controls    | Mean<br>duration:<br>cases;<br>controls | Combined odds ratio <sup>#</sup><br>(95% confidence interval) |
| <b>OESTROGEN ONLY</b>              |                                       |                                         |                                                               |                            |                                         |                                                               |
| <1 year                            | 629; 2917                             | 0.5; 0.5                                | 1.09 (1.00 to 1.19)                                           | 1241; 5928                 | 0.4; 0.4                                | 1.07 (1.00 to 1.14)                                           |
| 1-2 years                          | 962; 4626                             | 2.0; 2.0                                | 1.08 (1.00 to 1.16)                                           | 884; 4637                  | 1.9; 1.9                                | 0.98 (0.91 to 1.06)                                           |
| 3-4 years                          | 940; 4265                             | 4.0; 4.0                                | 1.15 (1.07 to 1.24) <sup>β</sup>                              | 601; 3033                  | 4.0; 4.0                                | 1.01 (0.93 to 1.11)                                           |
| 5-9 years                          | 1665; 7829                            | 7.3; 7.2                                | 1.14 (1.08 to 1.21) <sup>β</sup>                              | 929; 4813                  | 7.1; 7.2                                | 1.01 (0.94 to 1.08)                                           |
| 10+ years                          | 781; 3592                             | 13.0; 13.1                              | 1.17 (1.08 to 1.27) <sup>β</sup>                              | 228; 1159                  | 11.9; 11.8                              | 0.90 (0.70 to 1.15)                                           |
| For each year of use               |                                       |                                         | 1.02 (1.01 to 1.02) <sup>β</sup>                              |                            |                                         | 1.00 (0.99 to 1.01)                                           |
| <b>Conjugated equine oestrogen</b> |                                       |                                         |                                                               |                            |                                         |                                                               |
| <1 year                            | 284; 1431                             | 0.5; 0.5                                | 0.96 (0.84 to 1.09)                                           | 1018; 5294                 | 0.4; 0.4                                | 0.97 (0.91 to 1.04)                                           |
| 1-2 years                          | 373; 1919                             | 2.0; 2.0                                | 0.98 (0.87 to 1.10)                                           | 593; 2938                  | 1.8; 1.8                                | 1.01 (0.92 to 1.11)                                           |
| 3-4 years                          | 426; 1830                             | 4.0; 4.0                                | 1.19 (1.07 to 1.33) <sup>α</sup>                              | 324; 1632                  | 3.9; 3.9                                | 0.99 (0.88 to 1.12)                                           |
| 5-9 years                          | 736; 3397                             | 7.2; 7.2                                | 1.15 (1.06 to 1.25) <sup>α</sup>                              | 562; 2957                  | 8.0; 8.0                                | 0.97 (0.88 to 1.06)                                           |
| 10+ years                          | 292; 1475                             | 12.9; 12.9                              | 1.04 (0.92 to 1.18)                                           | n/d                        | n/d                                     | n/d                                                           |
| For each year of use               |                                       |                                         | 1.01 (1.00 to 1.02)                                           |                            |                                         | 0.99 (0.98 to 1.00)                                           |
| <b>Estradiol</b>                   |                                       |                                         |                                                               |                            |                                         |                                                               |
| <1 year                            | 601; 2823                             | 0.4; 0.5                                | 1.06 (0.96 to 1.16)                                           | 1083; 5589                 | 0.4; 0.4                                | 0.97 (0.90 to 1.04)                                           |
| 1-2 years                          | 733; 3444                             | 2.0; 2.0                                | 1.07 (0.99 to 1.17)                                           | 699; 3569                  | 1.9; 1.9                                | 0.99 (0.91 to 1.08)                                           |
| 3-4 years                          | 569; 2731                             | 3.9; 4.0                                | 1.07 (0.97 to 1.17)                                           | 383; 1977                  | 3.9; 3.9                                | 0.97 (0.87 to 1.09)                                           |
| 5-9 years                          | 891; 4172                             | 7.2; 7.1                                | 1.12 (1.04 to 1.21) <sup>α</sup>                              | 592; 2955                  | 7.8; 7.8                                | 1.01 (0.92 to 1.11)                                           |
| 10+ years                          | 398; 1667                             | 13.0; 13.1                              | 1.25 (1.12 to 1.40) <sup>β</sup>                              | n/d                        | n/d                                     | n/d                                                           |
| For each year of use               |                                       |                                         | 1.02 (1.01 to 1.02) <sup>β</sup>                              |                            |                                         | 1.00 (0.99 to 1.01)                                           |



| <b>OESTROGEN COMBINED with</b>    |             |            |                                  |             |            |                                  |
|-----------------------------------|-------------|------------|----------------------------------|-------------|------------|----------------------------------|
| <b>any progestogen</b>            |             |            |                                  |             |            |                                  |
| <1 year                           | 1911; 8627  | 0.5; 0.5   | 1.11 (1.06 to 1.17) <sup>β</sup> | 3501; 18025 | 0.5; 0.4   | 0.98 (0.94 to 1.02)              |
| 1-2 years                         | 2945; 11239 | 2.0; 2.0   | 1.34 (1.28 to 1.40) <sup>β</sup> | 2834; 13466 | 1.9; 1.9   | 1.05 (1.01 to 1.10)              |
| 3-4 years                         | 2671; 9166  | 4.0; 4.0   | 1.50 (1.43 to 1.57) <sup>β</sup> | 1766; 8183  | 4.0; 3.9   | 1.08 (1.02 to 1.14) <sup>α</sup> |
| 5-9 years                         | 4537; 14035 | 7.2; 7.1   | 1.70 (1.64 to 1.76) <sup>β</sup> | 2373; 10413 | 7.0; 7.0   | 1.17 (1.11 to 1.22) <sup>β</sup> |
| 10+ years                         | 1841; 4651  | 12.9; 12.7 | 2.05 (1.94 to 2.17) <sup>β</sup> | 470; 1827   | 11.6; 11.8 | 1.09 (0.91 to 1.30)              |
| For each year of use <sup>ν</sup> |             |            | 1.22 (1.21 to 1.23) <sup>β</sup> |             |            | 1.02 (1.01 to 1.03) <sup>β</sup> |
| <b>Medroxyprogesterone</b>        |             |            |                                  |             |            |                                  |
| <1 year                           | 1181; 4293  | 0.4; 0.4   | 1.14 (1.07 to 1.22) <sup>β</sup> | 1924; 8724  | 0.4; 0.4   | 0.98 (0.93 to 1.03)              |
| 1-2 years                         | 1085; 3583  | 1.9; 1.9   | 1.32 (1.23 to 1.42) <sup>β</sup> | 963; 4116   | 1.9; 1.8   | 1.03 (0.96 to 1.11)              |
| 3-4 years                         | 714; 2047   | 3.9; 3.9   | 1.62 (1.48 to 1.77) <sup>β</sup> | 455; 1836   | 3.9; 3.9   | 1.14 (1.03 to 1.27)              |
| 5-9 years                         | 621; 1673   | 6.8; 6.6   | 1.78 (1.62 to 1.96) <sup>β</sup> | 274; 1195   | 6.4; 6.4   | 1.07 (0.94 to 1.23)              |
| 10+ years                         | 119; 216    | 12.0; 12.1 | 2.63 (2.08 to 3.31) <sup>β</sup> | n/d         | n/d        | n/d                              |
| For each year of use              |             |            | 1.10 (1.09 to 1.11) <sup>β</sup> |             |            | 1.02 (1.00 to 1.03)              |
| <b>Levonorgestrel</b>             |             |            |                                  |             |            |                                  |
| <1 year                           | 1058; 4167  | 0.5; 0.5   | 1.12 (1.04 to 1.20) <sup>α</sup> | 3716; 17049 | 0.4; 0.4   | 0.99 (0.95 to 1.03)              |
| 1-2 years                         | 1152; 3943  | 2.0; 1.9   | 1.33 (1.24 to 1.43) <sup>β</sup> | 2436; 10199 | 1.9; 1.8   | 1.05 (1.00 to 1.10)              |
| 3-4 years                         | 884; 2889   | 4.0; 4.0   | 1.44 (1.33 to 1.56) <sup>β</sup> | 1269; 4987  | 3.9; 3.9   | 1.12 (1.05 to 1.19) <sup>β</sup> |
| 5-9 years                         | 1217; 3455  | 7.0; 7.0   | 1.73 (1.62 to 1.86) <sup>β</sup> | 1411; 5060  | 7.2; 7.2   | 1.24 (1.16 to 1.32) <sup>β</sup> |
| 10+ years                         | 297; 704    | 12.3; 12.3 | 2.13 (1.85 to 2.44) <sup>β</sup> | n/d         | n/d        | n/d                              |
| For each year of use <sup>δ</sup> |             |            | 1.08 (1.07 to 1.08) <sup>β</sup> |             |            | 1.07 (1.05 to 1.08) <sup>β</sup> |
| <b>Norethisterone</b>             |             |            |                                  |             |            |                                  |
| <1 year                           | 1931; 8218  | 0.5; 0.4   | 1.02 (0.97 to 1.08)              | 3764; 17319 | 0.4; 0.4   | 1.01 (0.97 to 1.05)              |
| 1-2 years                         | 1988; 7119  | 2.0; 1.9   | 1.28 (1.22 to 1.35) <sup>β</sup> | 1954; 8700  | 1.8; 1.8   | 1.05 (0.99 to 1.10)              |
| 3-4 years                         | 1362; 4401  | 3.9; 3.9   | 1.50 (1.41 to 1.60) <sup>β</sup> | 913; 4010   | 3.9; 3.9   | 1.07 (0.99 to 1.15)              |
| 5-9 years                         | 1680; 4633  | 7.0; 6.9   | 1.82 (1.72 to 1.93) <sup>β</sup> | 834; 3529   | 7.0; 7.0   | 1.14 (1.05 to 1.23) <sup>α</sup> |
| 10+ years                         | 408; 893    | 12.5; 12.2 | 2.28 (2.02 to 2.57) <sup>β</sup> | n/d         | n/d        | n/d                              |
| For each year of use <sup>ν</sup> |             |            | 1.24 (1.22 to 1.26) <sup>β</sup> |             |            | 1.02 (1.01 to 1.02) <sup>β</sup> |

| <b>Dydrogesterone</b> |           |            |                                  |            |          |                     |
|-----------------------|-----------|------------|----------------------------------|------------|----------|---------------------|
| <1 year               | 503; 1922 | 0.4; 0.4   | 1.05 (0.94 to 1.16)              | 953; 4229  | 0.4; 0.4 | 0.94 (0.87 to 1.01) |
| 1-2 years             | 307; 1350 | 1.9; 1.8   | 0.96 (0.85 to 1.09)              | 390; 1704  | 1.8; 1.8 | 0.97 (0.86 to 1.08) |
| 3-4 years             | 136; 601  | 4.0; 3.9   | 1.02 (0.85 to 1.24)              | 103; 568   | 3.7; 3.8 | 0.78 (0.63 to 0.96) |
| 5-9 years             | 127; 499  | 6.8; 6.7   | 1.18 (0.97 to 1.44)              | 67; 296    | 6.7; 6.8 | 1.07 (0.81 to 1.40) |
| 10+ years             | 28; 77    | 11.3; 11.7 | 1.72 (1.11 to 2.67)              | n/d        | n/d      | n/d                 |
| For each year of use  |           |            | 1.02 (1.00 to 1.04)              |            |          | 0.98 (0.95 to 1.01) |
| <b>TIBOLONE</b>       |           |            |                                  |            |          |                     |
| <1 year               | 656; 2850 | 0.4; 0.4   | 0.95 (0.87 to 1.04)              | 1527; 7035 | 0.4; 0.4 | 0.97 (0.92 to 1.03) |
| 1-2 years             | 501; 1904 | 1.9; 1.9   | 1.13 (1.03 to 1.26)              | 512; 2353  | 1.8; 1.8 | 0.98 (0.89 to 1.08) |
| 3-4 years             | 278; 1167 | 4.0; 3.9   | 1.13 (0.99 to 1.29)              | 201; 918   | 3.9; 3.9 | 1.02 (0.87 to 1.19) |
| 5-9 years             | 371; 1376 | 7.1; 7.0   | 1.30 (1.16 to 1.46) <sup>β</sup> | 173; 822   | 7.2; 7.3 | 1.02 (0.86 to 1.21) |
| 10+ years             | 89; 302   | 11.9; 12.7 | 1.46 (1.15 to 1.86) <sup>α</sup> | n/d        | n/d      | n/d                 |
| For each year of use  |           |            | 1.03 (1.02 to 1.05) <sup>β</sup> |            |          | 1.00 (0.98 to 1.02) |

<sup>#</sup>Odds ratios are with reference to never-users and based on cases and controls matched by age and practice and adjusted for smoking status, body mass index, family history of cancer, medical conditions and events, other medications and contraceptive drugs; <sup>α</sup> P-value<0.01;

<sup>β</sup> P-value<0.001; n/d – not enough data, few observations added to previous category;

<sup>γ</sup> duration for recent use was transformed as square root (exposure)

<sup>δ</sup> duration for past use was transformed as square root (exposure)

eTable 7 All cases and controls: Duration of use for different doses of hormones and types of application in women with recent (between >1 and <5 years before the index date) and past (5 years or more before the index date) exposures, combined analysis

|                                    | Recent use (between >1 and <5 years ) |                                                   | Past use (5 years or more) |                                                   |
|------------------------------------|---------------------------------------|---------------------------------------------------|----------------------------|---------------------------------------------------|
|                                    | N of cases;<br>controls               | Adjusted odds ratio#<br>(95% confidence interval) | N of cases;<br>controls    | Adjusted odds ratio#<br>(95% confidence interval) |
| <b>OESTROGEN ONLY</b>              |                                       |                                                   |                            |                                                   |
| <b>Conjugated equine oestrogen</b> |                                       |                                                   |                            |                                                   |
| <b>≤0.625mg</b>                    |                                       |                                                   |                            |                                                   |
| <1 year                            | 221; 1111                             | 0.98 (0.84 to 1.13)                               | 770; 4012                  | 0.98 (0.90 to 1.06)                               |
| 1-4 years                          | 553; 2618                             | 1.09 (0.99 to 1.20)                               | 671; 3186                  | 1.06 (0.97 to 1.15)                               |
| 5+ years                           | 655; 3097                             | 1.12 (1.03 to 1.23) <sup>a</sup>                  | 370; 2008                  | 0.94 (0.84 to 1.06)                               |
| <b>&gt;0.625mg</b>                 |                                       |                                                   |                            |                                                   |
| <1 year                            | 63; 320                               | 0.95 (0.72 to 1.25)                               | 248; 1282                  | 1.00 (0.87 to 1.15)                               |
| 1-4 years                          | 246; 1131                             | 1.11 (0.97 to 1.28)                               | 246; 1384                  | 0.90 (0.78 to 1.03)                               |
| 5+ years                           | 373; 1775                             | 1.15 (1.02 to 1.29)                               | 192; 949                   | 1.04 (0.89 to 1.22)                               |
| <b>Estradiol</b>                   |                                       |                                                   |                            |                                                   |
| <b>≤1mg</b>                        |                                       |                                                   |                            |                                                   |
| <1 year                            | 518; 2407                             | 1.08 (0.98 to 1.19)                               | 934; 4703                  | 1.01 (0.93 to 1.08)                               |
| 1-4 years                          | 974; 4623                             | 1.09 (1.02 to 1.18)                               | 865; 4365                  | 1.01 (0.94 to 1.09)                               |
| 5+ years                           | 906; 4116                             | 1.17 (1.08 to 1.26) <sup>b</sup>                  | 455; 2222                  | 1.04 (0.94 to 1.16)                               |
| <b>&gt;1mg</b>                     |                                       |                                                   |                            |                                                   |
| <1 year                            | 83; 416                               | 1.00 (0.79 to 1.27)                               | 149; 886                   | 0.84 (0.70 to 1.00)                               |
| 1-4 years                          | 328; 1551                             | 1.07 (0.95 to 1.21)                               | 217; 1180                  | 0.93 (0.80 to 1.08)                               |
| 5+ years                           | 383; 1723                             | 1.19 (1.06 to 1.34) <sup>a</sup>                  | 137; 733                   | 0.95 (0.79 to 1.15)                               |
| <b>oral</b>                        |                                       |                                                   |                            |                                                   |
| <1 year                            | 335; 1616                             | 1.03 (0.91 to 1.16)                               | 705; 3436                  | 1.03 (0.95 to 1.12)                               |
| 1-4 years                          | 533; 2651                             | 1.01 (0.92 to 1.11)                               | 502; 2403                  | 1.05 (0.95 to 1.16)                               |
| 5+ years                           | 415; 2037                             | 1.06 (0.95 to 1.19)                               | 189; 1004                  | 0.94 (0.81 to 1.11)                               |

|                             |            |                                  |             |                                  |
|-----------------------------|------------|----------------------------------|-------------|----------------------------------|
| <b>transdermal</b>          |            |                                  |             |                                  |
| <1 year                     | 426; 2022  | 1.03 (0.93 to 1.15)              | 927; 4934   | 0.93 (0.87 to 1.01)              |
| 1-4 years                   | 821; 3860  | 1.09 (1.00 to 1.18)              | 778; 4059   | 0.97 (0.89 to 1.05)              |
| 5+ years                    | 833; 3533  | 1.23 (1.14 to 1.33) <sup>β</sup> | 387; 1894   | 1.02 (0.91 to 1.14)              |
| <b>Levonorgestrel</b>       |            |                                  |             |                                  |
| <b>oral</b>                 |            |                                  |             |                                  |
| <1 year                     | 943; 3773  | 1.10 (1.02 to 1.18)              | 3679; 16954 | 0.99 (0.95 to 1.02)              |
| 1-4 years                   | 1798; 6043 | 1.39 (1.31 to 1.47) <sup>β</sup> | 3635; 14870 | 1.08 (1.03 to 1.12) <sup>β</sup> |
| 5+ years                    | 1430; 3909 | 1.81 (1.70 to 1.93) <sup>β</sup> | 1397; 4976  | 1.24 (1.17 to 1.33) <sup>β</sup> |
| <b>transdermal</b>          | 215; 768   | 1.13 (0.96 to 1.32)              | 250; 890    | 1.16 (1.00 to 1.34)              |
| <b>intra-uterine device</b> | 314; 971   | 1.29 (1.13 to 1.47) <sup>β</sup> | 58; 314     | 0.74 (0.55 to 0.98)              |
| <b>Norethisterone</b>       |            |                                  |             |                                  |
| <b>oral</b>                 |            |                                  |             |                                  |
| <1 year                     | 1764; 7539 | 1.01 (0.95 to 1.06)              | 3486; 15994 | 1.00 (0.96 to 1.04)              |
| 1-4 years                   | 2846; 9441 | 1.40 (1.34 to 1.46) <sup>β</sup> | 2318; 10275 | 1.04 (0.99 to 1.09)              |
| 5+ years                    | 1692; 4358 | 1.94 (1.83 to 2.06) <sup>β</sup> | 645; 2621   | 1.18 (1.08 to 1.29) <sup>β</sup> |
| <b>transdermal</b>          |            |                                  |             |                                  |
| <1 year                     | 523; 2163  | 1.01 (0.91 to 1.11)              | 1458; 6467  | 0.99 (0.93 to 1.05)              |
| 1-4 years                   | 601; 2260  | 1.21 (1.10 to 1.33) <sup>β</sup> | 811; 3451   | 1.03 (0.95 to 1.12)              |
| 5+ years                    | 307; 878   | 1.70 (1.49 to 1.94) <sup>β</sup> | 168; 727    | 1.06 (0.89 to 1.25)              |

#Odds ratios are with reference to never-users and based on cases and controls matched by age and practice and adjusted for smoking status, body mass index, family history of cancer, medical conditions and events, other medications and contraceptive drugs.

<sup>α</sup> P-value<0.01; <sup>β</sup> P-value<0.001

eFigure 2 Exposure to HRT by definition of recency

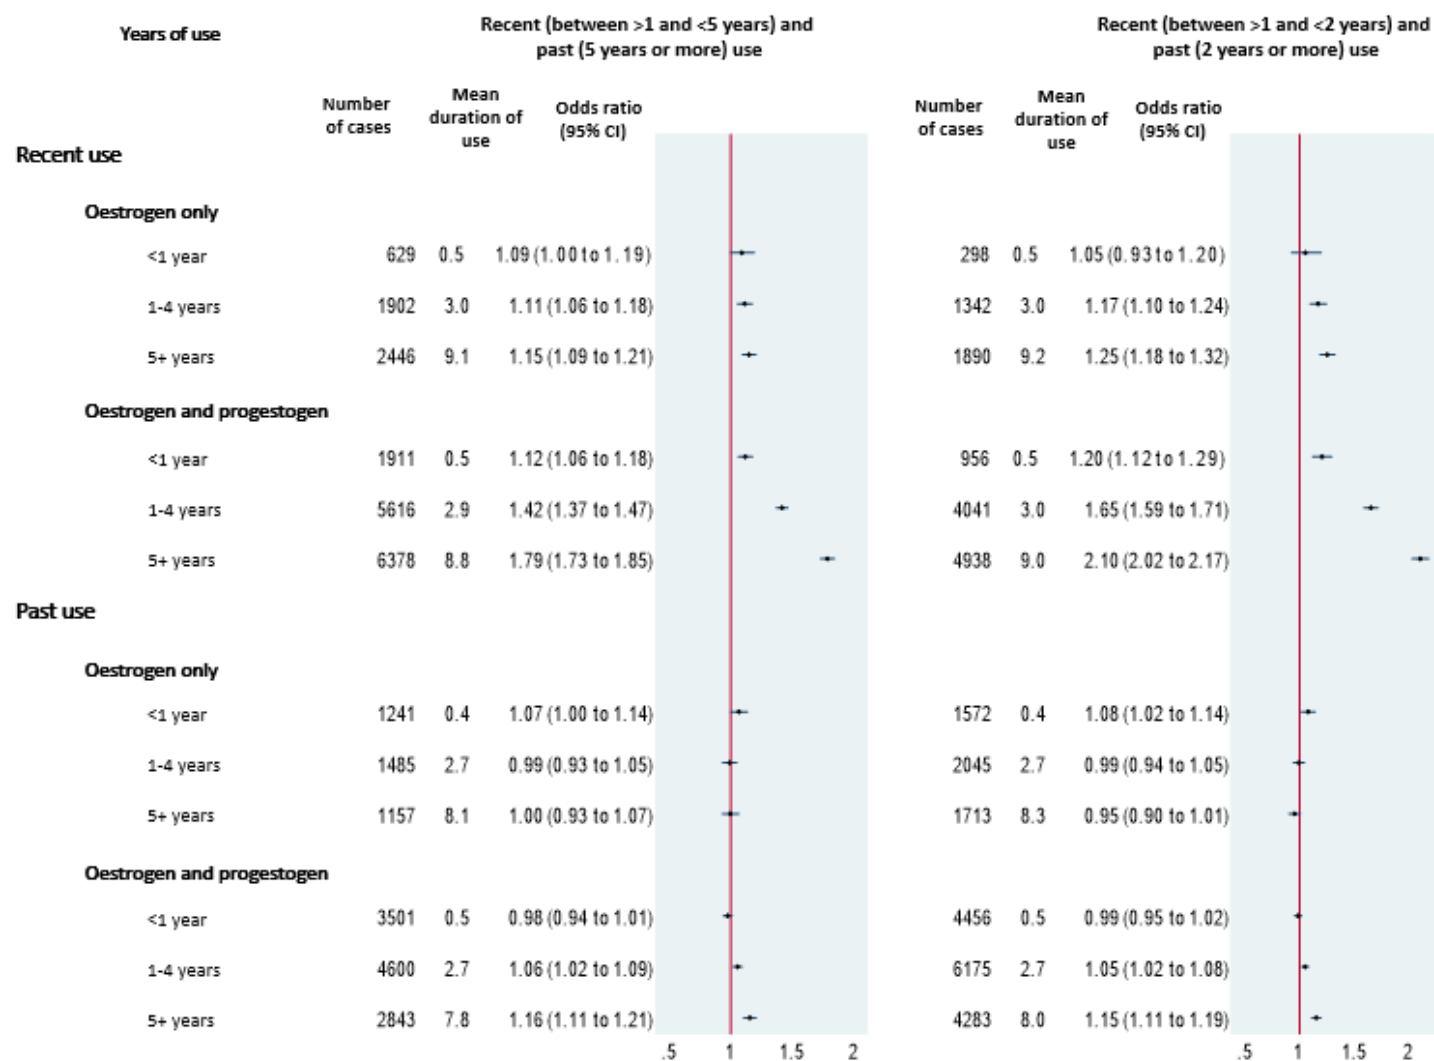

Odds ratios are with reference to never-users and adjusted for smoking, alcohol consumption, Townsend quintile (QResearch only), body mass index, ethnicity, history of other cancers, oophorectomy/hysterectomy, records of menopause, scans, comorbidities, other medications, years of data. Cases are matched to controls by age, general practice and index date.

eFigure 3 Duration of exposure to oestrogen-only and oestrogen-progestogen therapies and risks in recent (last use within >1 and <2 years before the index date) and past (≥2 years) users

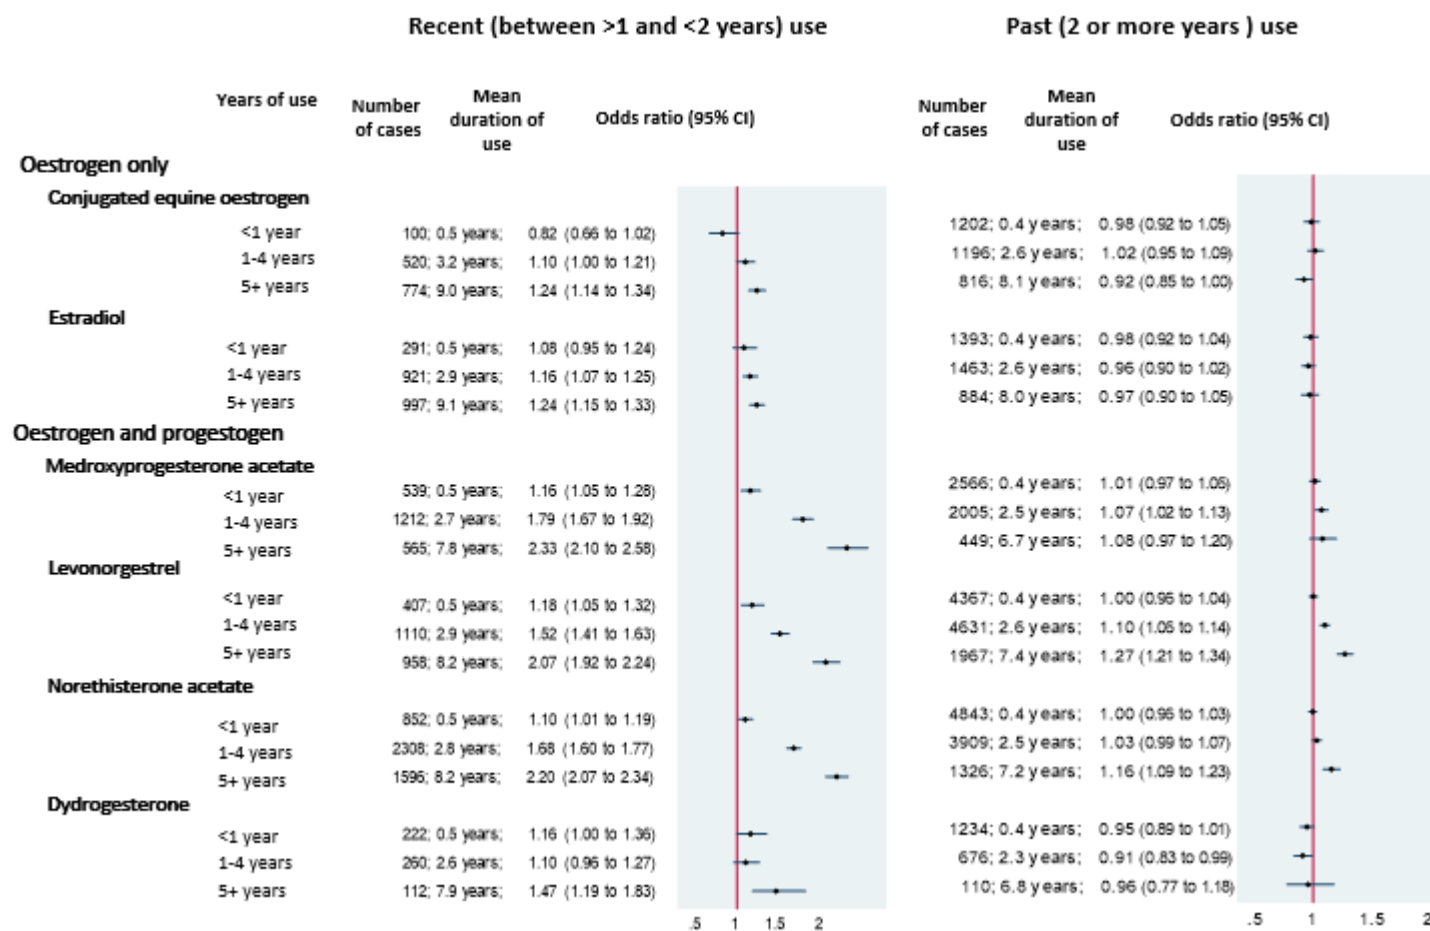

Odds ratios are with reference to never-users and adjusted for smoking, alcohol consumption, Townsend quintile (QResearch only), body mass index, ethnicity, history of other cancers, oophorectomy/hysterectomy, records of menopause, scans, comorbidities, other medications, years of data. Cases are matched to controls by age, general practice and index date.

eTable 8 All cases and controls: Duration of use for different hormones of HRT and tibolone in women with recent (between >1 and <2 years before the index date) and past (2 years or more before the index date) exposures, combined analysis

|                                    | Recent exposure (between >1 and <2 years ) |                                         |                                                               | Past exposures (2 years or more) |                                         |                                                               |
|------------------------------------|--------------------------------------------|-----------------------------------------|---------------------------------------------------------------|----------------------------------|-----------------------------------------|---------------------------------------------------------------|
|                                    | N of cases;<br>controls                    | Mean<br>duration:<br>cases;<br>controls | Combined odds ratio <sup>#</sup><br>(95% confidence interval) | N of cases;<br>controls          | Mean<br>duration:<br>cases;<br>controls | Combined odds ratio <sup>#</sup><br>(95% confidence interval) |
| <b>OESTROGEN ONLY</b>              |                                            |                                         |                                                               |                                  |                                         |                                                               |
| <1 year                            | 298; 1433                                  | 0.5; 0.5                                | 1.05 (0.92 to 1.20)                                           | 1572; 7412                       | 0.4; 0.4                                | 1.08 (1.02 to 1.14)                                           |
| 1-2 years                          | 648; 3037                                  | 2.0; 2.0                                | 1.12 (1.02 to 1.22)                                           | 1198; 6226                       | 1.9; 1.9                                | 0.98 (0.92 to 1.05)                                           |
| 3-4 years                          | 694; 3028                                  | 4.0; 4.0                                | 1.22 (1.12 to 1.33) <sup>β</sup>                              | 847; 4270                        | 4.0; 4.0                                | 1.01 (0.94 to 1.09)                                           |
| 5-9 years                          | 1259; 5488                                 | 7.3; 7.2                                | 1.25 (1.17 to 1.33) <sup>β</sup>                              | 1335; 7154                       | 7.2; 7.2                                | 0.97 (0.91 to 1.03)                                           |
| 10+ years                          | 631; 2688                                  | 13.1; 13.3                              | 1.26 (1.15 to 1.38) <sup>β</sup>                              | 378; 2063                        | 12.2; 12.1                              | 0.83 (0.69 to 1.01)                                           |
| <b>Conjugated equine oestrogen</b> |                                            |                                         |                                                               |                                  |                                         |                                                               |
| <1 year                            | 100; 592                                   | 0.5; 0.5                                | 0.82 (0.66 to 1.02)                                           | 1202; 6133                       | 0.4; 0.4                                | 0.98 (0.92 to 1.05)                                           |
| 1-2 years                          | 221; 1149                                  | 2.0; 2.1                                | 0.98 (0.85 to 1.14)                                           | 745; 3708                        | 1.8; 1.9                                | 1.01 (0.93 to 1.09)                                           |
| 3-4 years                          | 299; 1287                                  | 4.0; 4.0                                | 1.20 (1.06 to 1.37) <sup>α</sup>                              | 451; 2175                        | 3.9; 4.0                                | 1.04 (0.94 to 1.15)                                           |
| 5-9 years                          | 541; 2280                                  | 7.2; 7.2                                | 1.28 (1.16 to 1.41) <sup>β</sup>                              | 816; 4485                        | 8.1; 8.2                                | 0.92 (0.85 to 1.00)                                           |
| 10+ years                          | 233; 1064                                  | 13.1; 13.1                              | 1.16 (1.00 to 1.34)                                           | n/d                              | n/d                                     | n/d                                                           |
| <b>Estradiol</b>                   |                                            |                                         |                                                               |                                  |                                         |                                                               |
| <1 year                            | 291; 1326                                  | 0.5; 0.5                                | 1.08 (0.95 to 1.24)                                           | 1393; 7086                       | 0.4; 0.4                                | 0.98 (0.92 to 1.04)                                           |
| 1-2 years                          | 503; 2208                                  | 2.0; 2.0                                | 1.16 (1.05 to 1.29) <sup>α</sup>                              | 929; 4805                        | 1.9; 1.9                                | 0.97 (0.90 to 1.04)                                           |
| 3-4 years                          | 418; 1892                                  | 3.9; 4.0                                | 1.15 (1.03 to 1.28)                                           | 534; 2816                        | 3.9; 3.9                                | 0.95 (0.86 to 1.04)                                           |
| 5-9 years                          | 675; 2954                                  | 7.2; 7.1                                | 1.21 (1.11 to 1.32) <sup>β</sup>                              | 884; 4563                        | 8.0; 8.0                                | 0.97 (0.90 to 1.05)                                           |
| 10+ years                          | 322; 1277                                  | 13.1; 13.2                              | 1.32 (1.17 to 1.50) <sup>β</sup>                              | n/d                              | n/d                                     | n/d                                                           |
| <b>OESTROGEN COMBINED with</b>     |                                            |                                         |                                                               |                                  |                                         |                                                               |
| <b>any progestogen</b>             |                                            |                                         |                                                               |                                  |                                         |                                                               |
| <1 year                            | 956; 4010                                  | 0.5; 0.5                                | 1.20 (1.11 to 1.29) <sup>β</sup>                              | 4456; 22642                      | 0.5; 0.5                                | 0.99 (0.95 to 1.02)                                           |
| 1-2 years                          | 2052; 6821                                 | 2.0; 2.0                                | 1.57 (1.49 to 1.65) <sup>β</sup>                              | 3727; 17884                      | 1.9; 1.9                                | 1.04 (1.00 to 1.08)                                           |

|                            |            |            |                                  |             |            |                                  |
|----------------------------|------------|------------|----------------------------------|-------------|------------|----------------------------------|
| 3-4 years                  | 1989; 6045 | 4.0; 4.0   | 1.73 (1.64 to 1.82) <sup>β</sup> | 2448; 11304 | 4.0; 3.9   | 1.08 (1.03 to 1.13) <sup>α</sup> |
| 5-9 years                  | 3415; 9114 | 7.2; 7.1   | 1.99 (1.91 to 2.08) <sup>β</sup> | 3495; 15334 | 7.1; 7.0   | 1.16 (1.12 to 1.20) <sup>β</sup> |
| 10+ years                  | 1523; 3317 | 13.1; 12.9 | 2.37 (2.23 to 2.53) <sup>β</sup> | 788; 3161   | 11.8; 11.9 | 1.09 (0.95 to 1.25)              |
| <b>Medroxyprogesterone</b> |            |            |                                  |             |            |                                  |
| <1 year                    | 539; 1887  | 0.5; 0.5   | 1.16 (1.05 to 1.28) <sup>α</sup> | 2566; 11130 | 0.4; 0.4   | 1.01 (0.97 to 1.06)              |
| 1-2 years                  | 706; 2026  | 1.9; 1.9   | 1.66 (1.52 to 1.81) <sup>β</sup> | 1342; 5673  | 1.9; 1.9   | 1.04 (0.98 to 1.11)              |
| 3-4 years                  | 506; 1231  | 3.9; 3.9   | 2.02 (1.82 to 2.25) <sup>β</sup> | 663; 2652   | 3.9; 3.9   | 1.13 (1.04 to 1.24) <sup>α</sup> |
| 5-9 years                  | 465; 983   | 6.9; 6.7   | 2.27 (2.03 to 2.55) <sup>β</sup> | 449; 1921   | 6.7; 6.5   | 1.08 (0.97 to 1.20)              |
| 10+ years                  | 100; 180   | 12.1; 12.2 | 2.65 (2.06 to 3.41) <sup>β</sup> | n/d         | n/d        | n/d                              |
| <b>Levonorgestrel</b>      |            |            |                                  |             |            |                                  |
| <1 year                    | 407; 1491  | 0.5; 0.5   | 1.18 (1.06 to 1.33) <sup>α</sup> | 4367; 19725 | 0.4; 0.4   | 1.00 (0.97 to 1.04)              |
| 1-2 years                  | 606; 1986  | 2.0; 2.0   | 1.45 (1.32 to 1.60) <sup>β</sup> | 2982; 12156 | 1.9; 1.8   | 1.08 (1.03 to 1.13) <sup>β</sup> |
| 3-4 years                  | 504; 1561  | 4.0; 4.0   | 1.60 (1.45 to 1.78) <sup>β</sup> | 1649; 6315  | 3.9; 3.9   | 1.14 (1.08 to 1.21) <sup>β</sup> |
| 5-9 years                  | 748; 1937  | 7.1; 7.0   | 1.99 (1.83 to 2.18) <sup>β</sup> | 1967; 6836  | 7.4; 7.3   | 1.28 (1.21 to 1.35) <sup>β</sup> |
| 10+ years                  | 210; 446   | 12.4; 12.6 | 2.45 (2.07 to 2.90) <sup>β</sup> | n/d         | n/d        | n/d                              |
| <b>Norethisterone</b>      |            |            |                                  |             |            |                                  |
| <1 year                    | 852; 3392  | 0.5; 0.5   | 1.10 (1.01 to 1.19)              | 4843; 22145 | 0.4; 0.4   | 1.00 (0.96 to 1.03)              |
| 1-2 years                  | 1327; 4076 | 2.0; 1.9   | 1.60 (1.50 to 1.71) <sup>β</sup> | 2615; 11743 | 1.8; 1.8   | 1.02 (0.97 to 1.07)              |
| 3-4 years                  | 981; 2724  | 3.9; 3.9   | 1.82 (1.68 to 1.96) <sup>β</sup> | 1294; 5687  | 3.9; 3.9   | 1.06 (0.99 to 1.13)              |
| 5-9 years                  | 1254; 2939 | 7.0; 6.9   | 2.16 (2.02 to 2.31) <sup>β</sup> | 1326; 5428  | 7.2; 7.1   | 1.16 (1.09 to 1.24) <sup>β</sup> |
| 10+ years                  | 342; 688   | 12.7; 12.3 | 2.43 (2.13 to 2.77) <sup>β</sup> | n/d         | n/d        | n/d                              |
| <b>Dydrogesterone</b>      |            |            |                                  |             |            |                                  |
| <1 year                    | 222; 764   | 0.5; 0.4   | 1.17 (1.00 to 1.36)              | 1234; 5387  | 0.4; 0.4   | 0.95 (0.89 to 1.01)              |
| 1-2 years                  | 177; 725   | 1.9; 1.9   | 1.15 (0.97 to 1.35)              | 520; 2329   | 1.8; 1.8   | 0.94 (0.85 to 1.03)              |
| 3-4 years                  | 83; 372    | 4.0; 3.9   | 1.05 (0.83 to 1.34)              | 156; 797    | 3.8; 3.8   | 0.84 (0.70 to 1.00)              |
| 5+ years                   | 112; 360   | 7.9; 7.6   | 1.48 (1.19 to 1.84) <sup>β</sup> | 110; 512    | 6.8; 6.9   | 0.96 (0.78 to 1.19)              |
| <b>TIBOLONE</b>            |            |            |                                  |             |            |                                  |
| <1 year                    | 261; 1062  | 0.4; 0.4   | 1.00 (0.87 to 1.15)              | 1922; 8823  | 0.4; 0.4   | 0.97 (0.92 to 1.02)              |



|           |           |            |                                  |           |          |                     |
|-----------|-----------|------------|----------------------------------|-----------|----------|---------------------|
| 1-2 years | 314; 1107 | 2.0; 1.9   | 1.37 (1.21 to 1.56) <sup>β</sup> | 699; 3150 | 1.8; 1.8 | 0.99 (0.91 to 1.08) |
| 3-4 years | 196; 752  | 4.0; 3.9   | 1.28 (1.09 to 1.50) <sup>α</sup> | 283; 1333 | 3.9; 3.9 | 0.98 (0.86 to 1.12) |
| 5-9 years | 270; 907  | 7.1; 7.0   | 1.44 (1.25 to 1.65) <sup>β</sup> | 293; 1360 | 7.5; 7.4 | 1.04 (0.91 to 1.18) |
| 10+ years | 70; 233   | 12.0; 12.9 | 1.48 (1.13 to 1.94) <sup>α</sup> | n/d       | n/d      | n/d                 |

<sup>#</sup>Odds ratios are with reference to never-users and based on cases and controls matched by age and practice and adjusted for smoking status, body mass index, family history of cancer, medical conditions and events, other medications and contraceptive drugs; <sup>α</sup> P-value<0.01;

<sup>β</sup> P-value<0.001; n/d – not enough data, few observations added to previous category

eFigure 4 Recent (between >1 and <5 years) use of different types of HRT in women of different age

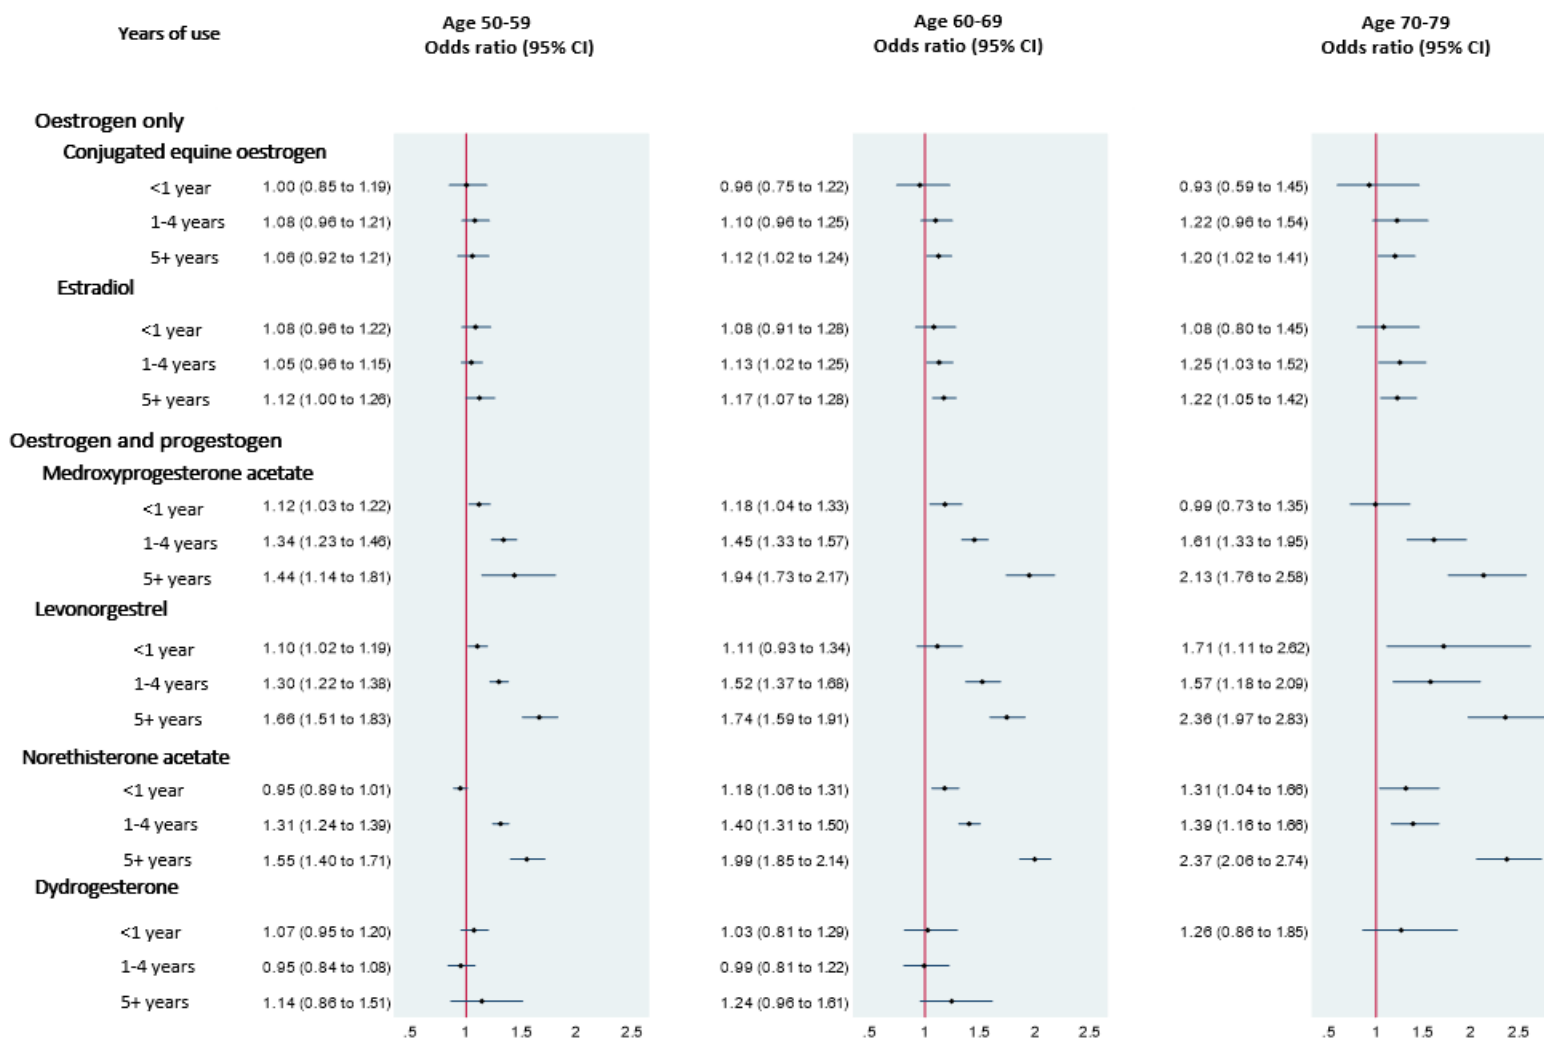

Odds ratios are with reference to never-users and adjusted for smoking, alcohol consumption, Townsend quintile (QResearch only), body mass index, ethnicity, history of other cancers, oophorectomy/hysterectomy, records of menopause, scans, comorbidities, other medications, years of data. Cases are matched to controls by age, general practice and index date.

eTable 9 Duration of use for different hormones of HRT and tibolone in women with recent (between >1 and <5 years ) different exposures by age at the index date

|                                                | Age 50-59                   |                                                | Age 60-69                   |                                                | Age 70-79                   |                                                |
|------------------------------------------------|-----------------------------|------------------------------------------------|-----------------------------|------------------------------------------------|-----------------------------|------------------------------------------------|
|                                                | N & mean duration for cases | Adjusted odds ratio# (95% confidence interval) | N & mean duration for cases | Adjusted odds ratio# (95% confidence interval) | N & mean duration for cases | Adjusted odds ratio# (95% confidence interval) |
| Total number of cases                          | 35394                       |                                                | 37015                       |                                                | 26202                       |                                                |
| <b>OESTROGEN ONLY</b>                          |                             |                                                |                             |                                                |                             |                                                |
| <1 year                                        | 384; 0.5                    | 1.14 (1.02 to 1.28)                            | 182; 0.5                    | 1.09 (0.92 to 1.28)                            | 63; 0.4                     | 1.12 (0.84 to 1.48)                            |
| 1-4 years                                      | 1010; 2.9                   | 1.12 (1.03 to 1.21) <sup>a</sup>               | 691; 3.1                    | 1.13 (1.04 to 1.24) <sup>a</sup>               | 201; 3.1                    | 1.26 (1.07 to 1.48) <sup>a</sup>               |
| 5+ years                                       | 735; 7.9                    | 1.08 (0.99 to 1.18)                            | 1266; 9.3                   | 1.17 (1.09 to 1.25) <sup>b</sup>               | 445; 10.7                   | 1.25 (1.11 to 1.39) <sup>b</sup>               |
| <b>Conjugated equine oestrogen</b>             |                             |                                                |                             |                                                |                             |                                                |
| <1 year                                        | 181; 0.5                    | 1.00 (0.85 to 1.19)                            | 78; 0.5                     | 0.96 (0.75 to 1.22)                            | 25; 0.4                     | 0.93 (0.59 to 1.45)                            |
| 1-4 years                                      | 399; 2.9                    | 1.08 (0.96 to 1.21)                            | 308; 3.1                    | 1.10 (0.96 to 1.25)                            | 92; 3.2                     | 1.22 (0.96 to 1.54)                            |
| 5+ years                                       | 290; 7.8                    | 1.06 (0.92 to 1.21)                            | 538; 8.9                    | 1.12 (1.02 to 1.24)                            | 200; 10.3                   | 1.20 (1.02 to 1.41)                            |
| <b>Estradiol</b>                               |                             |                                                |                             |                                                |                             |                                                |
| <1 year                                        | 366; 0.5                    | 1.08 (0.96 to 1.22)                            | 178; 0.4                    | 1.08 (0.91 to 1.28)                            | 57; 0.4                     | 1.08 (0.80 to 1.45)                            |
| 1-4 years                                      | 686; 2.7                    | 1.05 (0.96 to 1.15)                            | 479; 2.9                    | 1.13 (1.02 to 1.25)                            | 137; 3.0                    | 1.25 (1.03 to 1.52)                            |
| 5+ years                                       | 401; 7.7                    | 1.12 (1.00 to 1.26)                            | 663; 9.2                    | 1.17 (1.07 to 1.28) <sup>b</sup>               | 225; 10.5                   | 1.22 (1.05 to 1.42) <sup>a</sup>               |
| <b>OESTROGEN COMBINED with any progestogen</b> |                             |                                                |                             |                                                |                             |                                                |
| <1 year                                        | 1461; 0.5                   | 1.05 (0.99 to 1.12)                            | 373; 0.5                    | 1.27 (1.13 to 1.42) <sup>b</sup>               | 77; 0.4                     | 1.34 (1.03 to 1.73)                            |
| 1-4 years                                      | 3597; 2.8                   | 1.34 (1.28 to 1.39) <sup>b</sup>               | 1742; 3.2                   | 1.49 (1.41 to 1.58) <sup>b</sup>               | 277; 3.1                    | 1.62 (1.41 to 1.87) <sup>b</sup>               |
| 5+ years                                       | 1982; 7.5                   | 1.57 (1.48 to 1.66) <sup>b</sup>               | 3501; 9.1                   | 1.83 (1.75 to 1.91) <sup>b</sup>               | 895; 11.1                   | 2.20 (2.02 to 2.39) <sup>b</sup>               |
| <b>Medroxyprogesterone</b>                     |                             |                                                |                             |                                                |                             |                                                |
| <1 year                                        | 745; 0.4                    | 1.12 (1.03 to 1.22)                            | 377; 0.5                    | 1.18 (1.04 to 1.33) <sup>a</sup>               | 59; 0.4                     | 0.99 (0.73 to 1.35)                            |
| 1-4 years                                      | 769; 2.4                    | 1.34 (1.23 to 1.46) <sup>b</sup>               | 868; 2.9                    | 1.45 (1.33 to 1.57) <sup>b</sup>               | 162; 3.0                    | 1.61 (1.33 to 1.95) <sup>b</sup>               |
| 5+ years                                       | 100; 6.9                    | 1.44 (1.14 to 1.81) <sup>a</sup>               | 469; 7.4                    | 1.94 (1.73 to 2.17) <sup>b</sup>               | 171; 8.8                    | 2.13 (1.76 to 2.58) <sup>b</sup>               |
| <b>Levonorgestrel</b>                          |                             |                                                |                             |                                                |                             |                                                |
| <1 year                                        | 870; 0.5                    | 1.10 (1.02 to 1.19)                            | 156; 0.5                    | 1.11 (0.93 to 1.34)                            | 32; 0.5                     | 1.71 (1.11 to 2.62)                            |

|                       |           |                                  |           |                                  |           |                                  |
|-----------------------|-----------|----------------------------------|-----------|----------------------------------|-----------|----------------------------------|
| 1-4 years             | 1421; 2.7 | 1.30 (1.22 to 1.38) <sup>β</sup> | 546; 3.2  | 1.52 (1.37 to 1.68) <sup>β</sup> | 69; 2.8   | 1.57 (1.18 to 2.09) <sup>α</sup> |
| 5+ years              | 617; 7.1  | 1.66 (1.51 to 1.83) <sup>β</sup> | 702; 8.3  | 1.74 (1.59 to 1.91) <sup>β</sup> | 195; 10.2 | 2.36 (1.97 to 2.83) <sup>β</sup> |
| <b>Norethisterone</b> |           |                                  |           |                                  |           |                                  |
| <1 year               | 1301; 0.5 | 0.95 (0.89 to 1.01)              | 523; 0.5  | 1.18 (1.06 to 1.31) <sup>α</sup> | 107; 0.4  | 1.31 (1.04 to 1.66)              |
| 1-4 years             | 1939; 2.6 | 1.31 (1.24 to 1.39) <sup>β</sup> | 1236; 3.0 | 1.40 (1.31 to 1.50) <sup>β</sup> | 175; 2.9  | 1.39 (1.16 to 1.66) <sup>β</sup> |
| 5+ years              | 559; 7.0  | 1.55 (1.40 to 1.71) <sup>β</sup> | 1225; 8.2 | 1.99 (1.85 to 2.14) <sup>β</sup> | 304; 9.6  | 2.37 (2.06 to 2.74) <sup>β</sup> |
| <b>Dydrogesterone</b> |           |                                  |           |                                  |           |                                  |
| <1 year               | 395; 0.4  | 1.07 (0.95 to 1.20)              | 100; 0.4  | 1.03 (0.81 to 1.29)              | 38; 4.8   | 1.26 (0.86 to 1.85)              |
| 1-4 years             | 308; 2.5  | 0.95 (0.84 to 1.08)              | 120; 2.6  | 0.99 (0.81 to 1.22)              | n/d       | n/d                              |
| 5+ years              | 64; 6.7   | 1.14 (0.86 to 1.51)              | 76; 8.1   | 1.24 (0.96 to 1.61)              | n/d       | n/d                              |
| <b>TIBOLONE</b>       |           |                                  |           |                                  |           |                                  |
| <1 year               | 327; 0.4  | 0.87 (0.77 to 0.99)              | 286; 0.4  | 1.07 (0.94 to 1.23)              | 43; 0.4   | 0.85 (0.61 to 1.20)              |
| 1-4 years             | 264; 2.3  | 1.08 (0.94 to 1.23)              | 409; 2.8  | 1.14 (1.02 to 1.27)              | 106; 3.0  | 1.25 (1.00 to 1.57)              |
| 5+ years              | 48; 7.0   | 1.21 (0.88 to 1.66)              | 258; 7.7  | 1.29 (1.12 to 1.48) <sup>β</sup> | 154; 9.0  | 1.50 (1.25 to 1.81) <sup>β</sup> |

#Odds ratios are with reference to never-users and based on cases and controls matched by age and practice and adjusted for smoking status, body mass index, family history of cancer, medical conditions and events, other medications and contraceptive drugs.

<sup>α</sup> P-value<0.01; <sup>β</sup> P-value<0.001

eTable 10 Duration of use for different hormones of HRT and tibolone in women with *past* (5 years or more before the index date) different exposures by age at the index date

|                                                | Age 50-59                   |                                                | Age 60-69                   |                                                | Age 70-79                   |                                                |
|------------------------------------------------|-----------------------------|------------------------------------------------|-----------------------------|------------------------------------------------|-----------------------------|------------------------------------------------|
|                                                | N & mean duration for cases | Adjusted odds ratio# (95% confidence interval) | N & mean duration for cases | Adjusted odds ratio# (95% confidence interval) | N & mean duration for cases | Adjusted odds ratio# (95% confidence interval) |
| Total number of cases                          | 35394                       |                                                | 37015                       |                                                | 26202                       |                                                |
| <b>OESTROGEN ONLY</b>                          |                             |                                                |                             |                                                |                             |                                                |
| <1 year                                        | 250; 0.4                    | 1.05 (0.91 to 1.21)                            | 601; 0.4                    | 1.05 (0.96 to 1.16)                            | 390; 0.4                    | 1.09 (0.97 to 1.22)                            |
| 1-4 years                                      | 174; 2.5                    | 0.94 (0.79 to 1.11)                            | 817; 2.8                    | 0.94 (0.87 to 1.02)                            | 494; 2.7                    | 1.08 (0.97 to 1.20)                            |
| 5+ years                                       | 56; 7.1                     | 1.03 (0.77 to 1.38)                            | 590; 7.9                    | 0.93 (0.84 to 1.02)                            | 511; 8.4                    | 1.06 (0.95 to 1.17)                            |
| <b>Conjugated equine oestrogen</b>             |                             |                                                |                             |                                                |                             |                                                |
| <1 year                                        | 213; 0.4                    | 0.86 (0.74 to 1.00)                            | 534; 0.4                    | 1.02 (0.93 to 1.13)                            | 271; 0.4                    | 0.97 (0.84 to 1.11)                            |
| 1-4 years                                      | 135; 2.3                    | 0.98 (0.81 to 1.19)                            | 462; 2.7                    | 0.91 (0.82 to 1.02)                            | 320; 2.5                    | 1.14 (1.00 to 1.29)                            |
| 5+ years                                       | 27; 7.0                     | 1.01 (0.67 to 1.53)                            | 260; 7.7                    | 0.86 (0.75 to 0.98)                            | 275; 8.3                    | 1.04 (0.91 to 1.19)                            |
| <b>Estradiol</b>                               |                             |                                                |                             |                                                |                             |                                                |
| <1 year                                        | 238; 0.4                    | 0.92 (0.80 to 1.07)                            | 537; 0.4                    | 0.95 (0.86 to 1.05)                            | 308; 0.4                    | 1.03 (0.90 to 1.17)                            |
| 1-4 years                                      | 149; 2.3                    | 0.94 (0.78 to 1.12)                            | 607; 2.6                    | 0.93 (0.85 to 1.03)                            | 326; 2.7                    | 1.09 (0.96 to 1.24)                            |
| 5+ years                                       | 29; 6.7                     | 0.90 (0.60 to 1.34)                            | 334; 7.6                    | 1.00 (0.88 to 1.13)                            | 229; 8.2                    | 0.99 (0.85 to 1.15)                            |
| <b>OESTROGEN COMBINED with any progestogen</b> |                             |                                                |                             |                                                |                             |                                                |
| <1 year                                        | 850; 0.4                    | 1.00 (0.92 to 1.08)                            | 1880; 0.5                   | 0.96 (0.91 to 1.01)                            | 771; 0.5                    | 1.02 (0.94 to 1.11)                            |
| 1-4 years                                      | 606; 2.3                    | 0.96 (0.87 to 1.05)                            | 2805; 2.7                   | 1.06 (1.01 to 1.11)                            | 1189; 2.8                   | 1.15 (1.07 to 1.23) <sup>β</sup>               |
| 5+ years                                       | 107; 7.0                    | 0.93 (0.75 to 1.14)                            | 1619; 7.5                   | 1.15 (1.08 to 1.22) <sup>β</sup>               | 1117; 8.3                   | 1.26 (1.17 to 1.35) <sup>β</sup>               |
| <b>Medroxyprogesterone</b>                     |                             |                                                |                             |                                                |                             |                                                |
| <1 year                                        | 354; 0.4                    | 0.90 (0.80 to 1.02)                            | 1126; 0.4                   | 1.01 (0.94 to 1.08)                            | 444; 0.4                    | 0.98 (0.87 to 1.09)                            |
| 1-4 years                                      | 104; 2.2                    | 0.83 (0.67 to 1.03)                            | 850; 2.5                    | 1.07 (0.99 to 1.16)                            | 470; 2.7                    | 1.15 (1.03 to 1.29)                            |
| 5+ years                                       | n/d                         | n/d                                            | 145; 6.2                    | 1.07 (0.89 to 1.29)                            | 121; 6.7                    | 1.10 (0.90 to 1.35)                            |
| <b>Levonorgestrel</b>                          |                             |                                                |                             |                                                |                             |                                                |
| <1 year                                        | 985; 0.4                    | 1.04 (0.96 to 1.12)                            | 1995; 0.4                   | 0.97 (0.91 to 1.02)                            | 736; 0.4                    | 1.01 (0.93 to 1.11)                            |

|                       |          |                     |           |                                  |          |                                  |
|-----------------------|----------|---------------------|-----------|----------------------------------|----------|----------------------------------|
| 1-4 years             | 569; 2.2 | 1.03 (0.94 to 1.14) | 2217; 2.6 | 1.07 (1.01 to 1.13)              | 919; 2.6 | 1.10 (1.02 to 1.20)              |
| 5+ years              | 89; 6.7  | 1.29 (1.01 to 1.64) | 811; 7.0  | 1.18 (1.09 to 1.29) <sup>β</sup> | 511; 7.6 | 1.32 (1.18 to 1.47) <sup>β</sup> |
| <b>Norethisterone</b> |          |                     |           |                                  |          |                                  |
| <1 year               | 867; 0.4 | 0.99 (0.91 to 1.07) | 2105; 0.4 | 1.01 (0.96 to 1.06)              | 792; 0.4 | 1.07 (0.98 to 1.16)              |
| 1-4 years             | 394; 2.2 | 1.00 (0.89 to 1.12) | 1760; 2.5 | 1.05 (1.00 to 1.12)              | 713; 2.5 | 1.11 (1.01 to 1.21)              |
| 5+ years              | 34; 6.3  | 0.89 (0.61 to 1.29) | 473; 6.8  | 1.16 (1.04 to 1.29) <sup>α</sup> | 327; 7.5 | 1.19 (1.04 to 1.35) <sup>α</sup> |
| <b>Dydrogesterone</b> |          |                     |           |                                  |          |                                  |
| <1 year               | 281; 0.4 | 0.87 (0.76 to 1.00) | 574; 0.4  | 1.04 (0.94 to 1.15)              | 98; 0.4  | 0.74 (0.59 to 0.92) <sup>α</sup> |
| 1-4 years             | 117; 2.2 | 0.92 (0.75 to 1.13) | 306; 2.3  | 0.91 (0.80 to 1.03)              | 89; 2.9  | 1.06 (0.83 to 1.36)              |
| 5+ years              | n/d      | n/d                 | 48; 6.7   | 1.04 (0.75 to 1.43)              | n/d      | n/d                              |
| <b>TIBOLONE</b>       |          |                     |           |                                  |          |                                  |
| <1 year               | 219; 0.3 | 0.95 (0.82 to 1.10) | 831; 0.4  | 0.98 (0.90 to 1.06)              | 477; 0.4 | 0.96 (0.87 to 1.07)              |
| 1-4 years             | 49; 2.3  | 1.04 (0.76 to 1.43) | 393; 2.3  | 0.98 (0.88 to 1.10)              | 275; 2.6 | 0.99 (0.86 to 1.13)              |
| 5+ years              | n/d      | n/d                 | 70; 7.0   | 1.03 (0.80 to 1.34)              | 99; 7.4  | 1.00 (0.80 to 1.25)              |

#Odds ratios are with reference to never-users and based on cases and controls matched by age and practice and adjusted for smoking status, body mass index, family history of cancer, medical conditions and events, other medications and contraceptive drugs.

<sup>α</sup> P-value<0.01; <sup>β</sup> P-value<0.001

eFigure 5 Recent (between >1 and <5 years ) exposure to different types of HRT in women of different body mass index

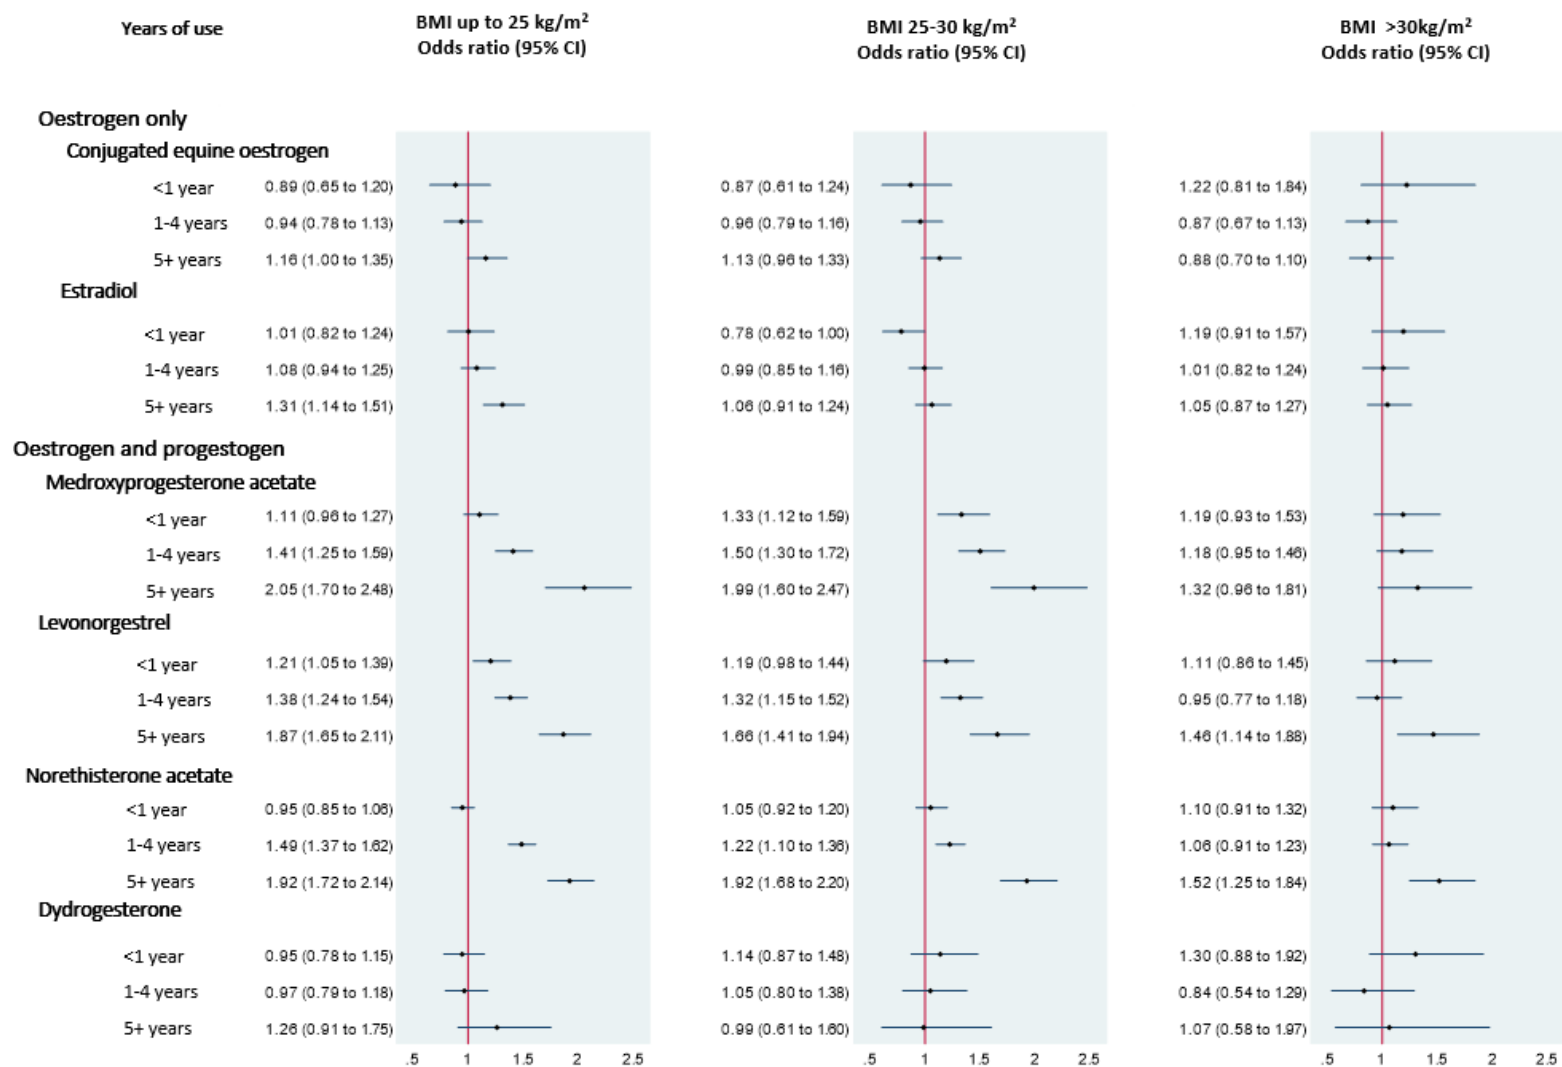

Odds ratios are with reference to never-users and adjusted for smoking, alcohol consumption, Townsend quintile (QResearch only), body mass index, ethnicity, history of other cancers, oophorectomy/hysterectomy, records of menopause, scans, comorbidities, other medications, years of data. Cases are matched to controls by age, general practice and index date.

eTable 11 Duration of use for different hormones of HRT and tibolone in women with **recent** (between >1 and <5 years before the index date) different exposures by body-mass categories at 1years before the index date

|                                                | BMI <25kg/m <sup>2</sup> |                                                            | BMI 25-30kg/m <sup>2</sup> |                                                            | BMI >30kg/m <sup>2</sup> |                                                            |
|------------------------------------------------|--------------------------|------------------------------------------------------------|----------------------------|------------------------------------------------------------|--------------------------|------------------------------------------------------------|
|                                                | N of cases; controls     | Adjusted odds ratio <sup>#</sup> (95% confidence interval) | N of cases; controls       | Adjusted odds ratio <sup>#</sup> (95% confidence interval) | N of cases; controls     | Adjusted odds ratio <sup>#</sup> (95% confidence interval) |
| Total number of women                          | 25779                    |                                                            | 23110                      |                                                            | 17254                    |                                                            |
| <b>OESTROGEN ONLY</b>                          |                          |                                                            |                            |                                                            |                          |                                                            |
| <1 year                                        | 156; 0.5                 | 1.01 (0.82 to 1.24)                                        | 113; 0.5                   | 0.81 (0.63 to 1.03)                                        | 109; 0.4                 | 1.21 (0.92 to 1.58)                                        |
| 1-4 years                                      | 506; 2.9                 | 1.09 (0.96 to 1.23)                                        | 441; 3.0                   | 0.97 (0.85 to 1.11)                                        | 266; 3.0                 | 1.02 (0.86 to 1.22)                                        |
| 5+ years                                       | 713; 9.1                 | 1.24 (1.11 to 1.38) <sup>β</sup>                           | 645; 9.3                   | 1.10 (0.99 to 1.24)                                        | 357; 9.3                 | 0.98 (0.85 to 1.14)                                        |
| <b>Conjugated equine oestrogen</b>             |                          |                                                            |                            |                                                            |                          |                                                            |
| <1 year                                        | 71; 0.5                  | 0.89 (0.65 to 1.20)                                        | 50; 0.5                    | 0.87 (0.61 to 1.24)                                        | 48; 0.4                  | 1.22 (0.81 to 1.84)                                        |
| 1-4 years                                      | 204; 3.1                 | 0.94 (0.78 to 1.13)                                        | 189; 3.0                   | 0.96 (0.79 to 1.16)                                        | 103; 3.0                 | 0.87 (0.67 to 1.13)                                        |
| 5+ years                                       | 309; 9.0                 | 1.16 (1.00 to 1.35)                                        | 285; 8.7                   | 1.13 (0.96 to 1.33)                                        | 137; 9.0                 | 0.88 (0.70 to 1.10)                                        |
| <b>Estradiol</b>                               |                          |                                                            |                            |                                                            |                          |                                                            |
| <1 year                                        | 158; 0.5                 | 1.01 (0.82 to 1.24)                                        | 114; 0.4                   | 0.78 (0.62 to 1.00)                                        | 107; 0.4                 | 1.19 (0.91 to 1.57)                                        |
| 1-4 years                                      | 345; 2.7                 | 1.08 (0.94 to 1.25)                                        | 318; 2.9                   | 0.99 (0.85 to 1.16)                                        | 184; 2.9                 | 1.01 (0.82 to 1.24)                                        |
| 5+ years                                       | 374; 8.8                 | 1.31 (1.14 to 1.51) <sup>β</sup>                           | 317; 9.4                   | 1.06 (0.91 to 1.24)                                        | 205; 9.2                 | 1.05 (0.87 to 1.27)                                        |
| <b>OESTROGEN COMBINED with any progestogen</b> |                          |                                                            |                            |                                                            |                          |                                                            |
| <1 year                                        | 605; 0.5                 | 1.08 (0.97 to 1.20)                                        | 412; 0.5                   | 1.14 (1.00 to 1.31)                                        | 239; 0.5                 | 1.12 (0.93 to 1.34)                                        |
| 1-4 years                                      | 1987; 3.0                | 1.49 (1.39 to 1.59) <sup>β</sup>                           | 1228; 3.0                  | 1.36 (1.25 to 1.48) <sup>β</sup>                           | 589; 2.9                 | 1.13 (1.00 to 1.27)                                        |
| 5+ years                                       | 2316; 9.0                | 1.93 (1.80 to 2.06) <sup>β</sup>                           | 1566; 8.8                  | 1.71 (1.58 to 1.85) <sup>β</sup>                           | 691; 8.9                 | 1.38 (1.23 to 1.55) <sup>β</sup>                           |
| <b>Medroxyprogesterone</b>                     |                          |                                                            |                            |                                                            |                          |                                                            |
| <1 year                                        | 399; 0.4                 | 1.11 (0.96 to 1.27)                                        | 271; 0.5                   | 1.33 (1.12 to 1.59) <sup>α</sup>                           | 131; 0.5                 | 1.19 (0.93 to 1.53)                                        |
| 1-4 years                                      | 582; 2.7                 | 1.41 (1.25 to 1.59) <sup>β</sup>                           | 454; 2.7                   | 1.50 (1.30 to 1.72) <sup>β</sup>                           | 182; 2.8                 | 1.18 (0.95 to 1.46)                                        |
| 5+ years                                       | 264; 7.8                 | 2.05 (1.70 to 2.48) <sup>β</sup>                           | 198; 7.6                   | 1.99 (1.60 to 2.47) <sup>β</sup>                           | 83; 7.8                  | 1.32 (0.96 to 1.81)                                        |



|                       |           |                                  |          |                                  |          |                                  |
|-----------------------|-----------|----------------------------------|----------|----------------------------------|----------|----------------------------------|
| <b>Levonorgestrel</b> |           |                                  |          |                                  |          |                                  |
| <1 year               | 388; 0.5  | 1.21 (1.05 to 1.39) <sup>a</sup> | 217; 0.5 | 1.19 (0.98 to 1.44)              | 115; 0.5 | 1.11 (0.86 to 1.45)              |
| 1-4 years             | 742; 2.9  | 1.38 (1.24 to 1.54) <sup>β</sup> | 437; 2.8 | 1.32 (1.15 to 1.52) <sup>β</sup> | 174; 3.0 | 0.95 (0.77 to 1.18)              |
| 5+ years              | 561; 8.3  | 1.87 (1.65 to 2.11) <sup>β</sup> | 344; 8.1 | 1.66 (1.41 to 1.94) <sup>β</sup> | 138; 7.8 | 1.46 (1.14 to 1.88) <sup>a</sup> |
| <b>Norethisterone</b> |           |                                  |          |                                  |          |                                  |
| <1 year               | 634; 0.5  | 0.95 (0.85 to 1.06)              | 446; 0.5 | 1.05 (0.92 to 1.20)              | 236; 0.4 | 1.10 (0.91 to 1.32)              |
| 1-4 years             | 1235; 2.7 | 1.49 (1.37 to 1.62) <sup>β</sup> | 727; 2.8 | 1.22 (1.10 to 1.36) <sup>β</sup> | 352; 2.8 | 1.06 (0.91 to 1.23)              |
| 5+ years              | 766; 8.1  | 1.92 (1.72 to 2.14) <sup>β</sup> | 522; 8.0 | 1.92 (1.68 to 2.20) <sup>β</sup> | 232; 8.3 | 1.52 (1.25 to 1.84) <sup>β</sup> |
| <b>Dydrogesterone</b> |           |                                  |          |                                  |          |                                  |
| <1 year               | 188; 0.4  | 0.95 (0.78 to 1.15)              | 115; 0.5 | 1.14 (0.87 to 1.48)              | 60; 0.5  | 1.30 (0.88 to 1.92)              |
| 1-4 years             | 174; 2.6  | 0.97 (0.79 to 1.18)              | 97; 2.5  | 1.05 (0.80 to 1.38)              | 38; 2.5  | 0.84 (0.54 to 1.29)              |
| 5+ years              | 66; 7.7   | 1.26 (0.91 to 1.75)              | 28; 7.0  | 0.99 (0.61 to 1.60)              | 18; 7.9  | 1.07 (0.58 to 1.97)              |
|                       |           |                                  |          |                                  |          |                                  |
| <b>TIBOLONE</b>       |           |                                  |          |                                  |          |                                  |
| <1 year               | 210; 0.4  | 0.94 (0.79 to 1.13)              | 134; 0.4 | 0.84 (0.67 to 1.05)              | 76; 0.4  | 0.74 (0.55 to 1.00)              |
| 1-4 years             | 241; 2.7  | 1.10 (0.93 to 1.31)              | 186; 2.7 | 1.12 (0.92 to 1.37)              | 102; 2.7 | 1.12 (0.85 to 1.47)              |
| 5+ years              | 146; 7.8  | 1.45 (1.15 to 1.82) <sup>a</sup> | 131; 8.1 | 1.45 (1.14 to 1.84) <sup>a</sup> | 53; 8.0  | 1.02 (0.71 to 1.46)              |

<sup>a</sup>Odds ratios are with reference to never-users and based on cases and controls matched by age and practice and adjusted for smoking status, body mass index, family history of cancer, medical conditions and events, other medications and contraceptive drugs.

<sup>a</sup> P-value<0.01; <sup>β</sup> P-value<0.001

eTable 12 Duration of use for different hormones of HRT and tibolone in women with *past* (5 years or more before the index date) different exposures by body-mass categories at 1 year before the index date

|                                                    | BMI <25kg/m <sup>2</sup> |                                                      | BMI 25-30kg/m <sup>2</sup> |                                                      | BMI >30kg/m <sup>2</sup> |                                                      |
|----------------------------------------------------|--------------------------|------------------------------------------------------|----------------------------|------------------------------------------------------|--------------------------|------------------------------------------------------|
|                                                    | N of cases;<br>controls  | Adjusted odds ratio#<br>(95% confidence<br>interval) | N of cases;<br>controls    | Adjusted odds ratio#<br>(95% confidence<br>interval) | N of cases;<br>controls  | Adjusted odds ratio#<br>(95% confidence<br>interval) |
| Total number of women                              | 25779                    |                                                      | 23110                      |                                                      | 17254                    |                                                      |
| <b>OESTROGEN ONLY</b>                              |                          |                                                      |                            |                                                      |                          |                                                      |
| <1 year                                            | 248; 0.5                 | 1.03 (0.87 to 1.21)                                  | 314; 0.4                   | 1.00 (0.86 to 1.16)                                  | 300; 0.4                 | 1.04 (0.89 to 1.22)                                  |
| 1-4 years                                          | 307; 2.8                 | 1.05 (0.90 to 1.22)                                  | 398; 2.8                   | 0.96 (0.84 to 1.10)                                  | 398; 2.6                 | 1.02 (0.89 to 1.18)                                  |
| 5+ years                                           | 260; 8.2                 | 0.98 (0.83 to 1.15)                                  | 332; 8.1                   | 1.08 (0.93 to 1.25)                                  | 299; 8.0                 | 0.99 (0.84 to 1.16)                                  |
| <b>Conjugated equine oestrogen</b>                 |                          |                                                      |                            |                                                      |                          |                                                      |
| <1 year                                            | 194; 0.4                 | 0.83 (0.69 to 1.00)                                  | 261; 0.4                   | 0.92 (0.78 to 1.08)                                  | 239; 0.4                 | 0.92 (0.78 to 1.10)                                  |
| 1-4 years                                          | 201; 2.6                 | 1.07 (0.88 to 1.28)                                  | 249; 2.6                   | 0.98 (0.83 to 1.16)                                  | 228; 2.5                 | 1.15 (0.96 to 1.38)                                  |
| 5+ years                                           | 130; 8.1                 | 1.02 (0.81 to 1.27)                                  | 167; 7.9                   | 1.09 (0.89 to 1.34)                                  | 137; 7.9                 | 0.99 (0.79 to 1.24)                                  |
| <b>Estradiol</b>                                   |                          |                                                      |                            |                                                      |                          |                                                      |
| <1 year                                            | 226; 0.4                 | 0.90 (0.76 to 1.07)                                  | 263; 0.4                   | 0.89 (0.76 to 1.05)                                  | 287; 0.4                 | 1.03 (0.88 to 1.21)                                  |
| 1-4 years                                          | 221; 2.5                 | 1.00 (0.84 to 1.19)                                  | 291; 2.7                   | 0.95 (0.81 to 1.11)                                  | 293; 2.6                 | 1.01 (0.86 to 1.19)                                  |
| 5+ years                                           | 131; 8.0                 | 0.92 (0.74 to 1.15)                                  | 176; 7.7                   | 1.12 (0.92 to 1.36)                                  | 139; 7.7                 | 0.86 (0.69 to 1.07)                                  |
| <b>OESTROGEN COMBINED with<br/>any progestogen</b> |                          |                                                      |                            |                                                      |                          |                                                      |
| <1 year                                            | 870; 0.5                 | 0.96 (0.88 to 1.04)                                  | 931; 0.5                   | 0.93 (0.85 to 1.02)                                  | 764; 0.4                 | 1.00 (0.90 to 1.10)                                  |
| 1-4 years                                          | 1137; 2.7                | 1.04 (0.95 to 1.12)                                  | 1247; 2.7                  | 1.01 (0.93 to 1.09)                                  | 999; 2.6                 | 1.08 (0.99 to 1.19)                                  |
| 5+ years                                           | 781; 7.9                 | 1.14 (1.03 to 1.26)                                  | 796; 7.8                   | 1.17 (1.06 to 1.30) <sup>a</sup>                     | 557; 7.7                 | 1.19 (1.05 to 1.34) <sup>a</sup>                     |
| <b>Medroxyprogesterone</b>                         |                          |                                                      |                            |                                                      |                          |                                                      |
| <1 year                                            | 540; 0.4                 | 0.99 (0.88 to 1.12)                                  | 510; 0.4                   | 0.94 (0.84 to 1.06)                                  | 400; 0.4                 | 1.08 (0.94 to 1.25)                                  |
| 1-4 years                                          | 387; 2.6                 | 1.11 (0.97 to 1.27)                                  | 367; 2.5                   | 1.01 (0.88 to 1.17)                                  | 273; 2.5                 | 0.99 (0.84 to 1.17)                                  |
| 5+ years                                           | 85; 6.3                  | 1.17 (0.87 to 1.56)                                  | 79; 6.5                    | 1.22 (0.90 to 1.65)                                  | 37; 6.5                  | 0.65 (0.43 to 0.97)                                  |
| <b>Levonorgestrel</b>                              |                          |                                                      |                            |                                                      |                          |                                                      |

|                       |           |                                  |           |                     |          |                     |
|-----------------------|-----------|----------------------------------|-----------|---------------------|----------|---------------------|
| <1 year               | 988; 0.5  | 0.96 (0.88 to 1.05)              | 948; 0.4  | 0.93 (0.85 to 1.02) | 731; 0.4 | 1.13 (1.01 to 1.25) |
| 1-4 years             | 1025; 2.6 | 1.07 (0.97 to 1.17)              | 1022; 2.5 | 1.10 (1.00 to 1.21) | 669; 2.5 | 1.11 (0.99 to 1.24) |
| 5+ years              | 478; 7.4  | 1.31 (1.15 to 1.50) <sup>β</sup> | 372; 7.1  | 1.19 (1.03 to 1.37) | 231; 7.1 | 1.26 (1.05 to 1.52) |
| <b>Norethisterone</b> |           |                                  |           |                     |          |                     |
| <1 year               | 1019; 0.4 | 0.96 (0.88 to 1.04)              | 1044; 0.4 | 1.02 (0.93 to 1.11) | 752; 0.4 | 1.04 (0.93 to 1.15) |
| 1-4 years             | 747; 2.5  | 0.97 (0.88 to 1.07)              | 815; 2.5  | 1.08 (0.97 to 1.19) | 588; 2.5 | 1.08 (0.96 to 1.22) |
| 5+ years              | 225; 7.1  | 1.03 (0.87 to 1.23)              | 232; 7.0  | 1.12 (0.94 to 1.34) | 158; 7.0 | 1.32 (1.05 to 1.65) |
| <b>Dydrogesterone</b> |           |                                  |           |                     |          |                     |
| <1 year               | 271; 0.4  | 0.97 (0.83 to 1.14)              | 235; 0.4  | 0.88 (0.74 to 1.05) | 187; 0.4 | 0.97 (0.79 to 1.18) |
| 1-4 years             | 148; 2.2  | 0.98 (0.79 to 1.22)              | 136; 2.2  | 0.98 (0.77 to 1.24) | 86; 2.3  | 0.80 (0.61 to 1.07) |
| 5+ years              | 21; 6.9   | 0.97 (0.55 to 1.74)              | 18; 6.5   | 1.13 (0.61 to 2.08) | 14; 6.8  | 1.30 (0.61 to 2.76) |
| <b>TIBOLONE</b>       |           |                                  |           |                     |          |                     |
| <1 year               | 366; 0.4  | 0.93 (0.81 to 1.06)              | 434; 0.4  | 0.98 (0.86 to 1.11) | 342; 0.4 | 1.16 (1.00 to 1.36) |
| 1-4 years             | 151; 2.4  | 0.82 (0.67 to 1.01)              | 205; 2.4  | 0.92 (0.77 to 1.10) | 168; 2.4 | 1.14 (0.92 to 1.41) |
| 5+ years              | 50; 7.3   | 1.32 (0.91 to 1.93)              | 46; 7.4   | 0.91 (0.63 to 1.31) | 31; 6.6  | 0.88 (0.56 to 1.39) |

#Odds ratios are with reference to never-users and based on cases and controls matched by age and practice and adjusted for smoking status, body mass index, family history of cancer, medical conditions and events, other medications and contraceptive drugs.

<sup>α</sup> P-value<0.01; <sup>β</sup> P-value<0.001

eFigure 6 Sensitivity analyses: women with 10 years of records and women 55 years and older

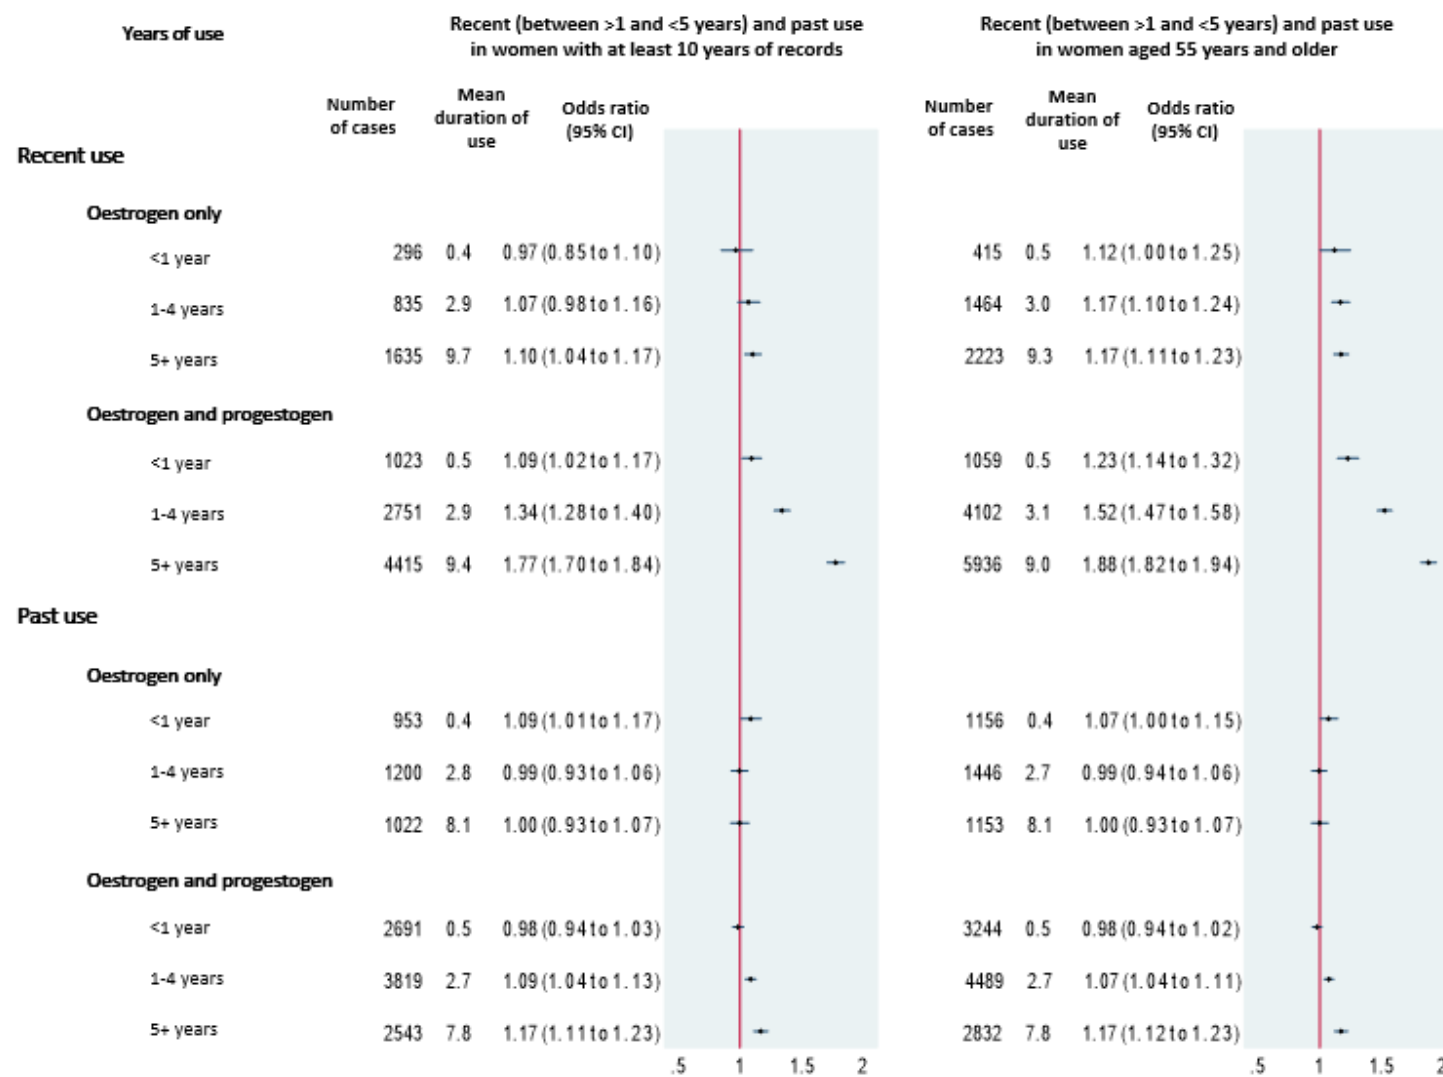

Odds ratios are with reference to never-users and adjusted for smoking, alcohol consumption, Townsend quintile (QResearch only), body mass index, ethnicity, history of other cancers, oophorectomy/hysterectomy, records of menopause, scans, comorbidities, other medications, years of data. Cases are matched to controls by age, general practice and index date.

eTable 13 All cases and controls with 10 years of records: Duration of use for different hormones of HRT and tibolone in women with recent (between >1 and <5 years before the index date) and past (5 years or more before the index date) exposures, combined analysis

|                                                              | Recent exposure (between >1 and <5 years ) |                                         |                                                   | Past exposures (5 years or more) |                                         |                                                   |
|--------------------------------------------------------------|--------------------------------------------|-----------------------------------------|---------------------------------------------------|----------------------------------|-----------------------------------------|---------------------------------------------------|
| Total number of women:<br>62709 cases and 259147<br>controls | N of cases;<br>controls                    | Mean<br>duration:<br>cases;<br>controls | Combined odds ratio#<br>(95% confidence interval) | N of cases;<br>controls          | Mean<br>duration:<br>cases;<br>controls | Combined odds ratio#<br>(95% confidence interval) |
| <b>OESTROGEN ONLY</b>                                        |                                            |                                         |                                                   |                                  |                                         |                                                   |
| <1 year                                                      | 296; 1288                                  | 0.4; 0.5                                | 0.96 (0.85 to 1.10)                               | 953; 4020                        | 0.4; 0.4                                | 1.09 (1.01 to 1.17)                               |
| 1-2 years                                                    | 438; 1828                                  | 1.9; 2.0                                | 1.08 (0.97 to 1.21)                               | 696; 3262                        | 1.9; 1.9                                | 0.99 (0.90 to 1.08)                               |
| 3-4 years                                                    | 397; 1711                                  | 4.0; 4.0                                | 1.05 (0.94 to 1.18)                               | 504; 2240                        | 4.0; 4.0                                | 1.02 (0.92 to 1.13)                               |
| 5-9 years                                                    | 986; 4269                                  | 7.5; 7.5                                | 1.08 (1.00 to 1.16)                               | 814; 3787                        | 7.2; 7.2                                | 1.00 (0.92 to 1.09)                               |
| 10+ years                                                    | 649; 2661                                  | 13.1; 13.2                              | 1.15 (1.05 to 1.26) <sup>a</sup>                  | 208; 945                         | 11.9; 11.8                              | 1.02 (0.88 to 1.20)                               |
| <b>Conjugated equine oestrogen</b>                           |                                            |                                         |                                                   |                                  |                                         |                                                   |
| <1 year                                                      | 119; 559                                   | 0.4; 0.4                                | 0.84 (0.68 to 1.03)                               | 805; 3646                        | 0.4; 0.4                                | 1.00 (0.92 to 1.09)                               |
| 1-2 years                                                    | 164; 662                                   | 1.9; 2.0                                | 1.04 (0.87 to 1.25)                               | 454; 2030                        | 1.8; 1.8                                | 1.00 (0.90 to 1.11)                               |
| 3-4 years                                                    | 156; 672                                   | 4.0; 4.0                                | 1.03 (0.86 to 1.23)                               | 267; 1212                        | 3.9; 4.0                                | 0.98 (0.85 to 1.12)                               |
| 5-9 years                                                    | 436; 1824                                  | 7.4; 7.5                                | 1.10 (0.98 to 1.23)                               | 494; 2355                        | 8.0; 8.1                                | 0.97 (0.87 to 1.07)                               |
| 10+ years                                                    | 240; 1086                                  | 13.0; 13.0                              | 1.03 (0.89 to 1.19)                               | n/d                              | n/d                                     | n/d                                               |
| <b>Estradiol</b>                                             |                                            |                                         |                                                   |                                  |                                         |                                                   |
| <1 year                                                      | 310; 1332                                  | 0.4; 0.4                                | 0.99 (0.87 to 1.13)                               | 848; 3867                        | 0.4; 0.4                                | 0.99 (0.92 to 1.07)                               |
| 1-2 years                                                    | 369; 1528                                  | 1.9; 1.9                                | 1.08 (0.96 to 1.22)                               | 550; 2588                        | 1.9; 1.9                                | 0.96 (0.87 to 1.06)                               |
| 3-4 years                                                    | 274; 1254                                  | 4.0; 4.0                                | 0.99 (0.87 to 1.13)                               | 333; 1475                        | 4.0; 3.9                                | 1.00 (0.89 to 1.14)                               |
| 5-9 years                                                    | 542; 2338                                  | 7.4; 7.3                                | 1.06 (0.96 to 1.17)                               | 523; 2323                        | 7.8; 7.8                                | 1.01 (0.92 to 1.12)                               |
| 10+ years                                                    | 334; 1245                                  | 13.0; 13.2                              | 1.21 (1.07 to 1.37) <sup>a</sup>                  | n/d                              | n/d                                     | n/d                                               |
| <b>OESTROGEN COMBINED with<br/>any progestogen</b>           |                                            |                                         |                                                   |                                  |                                         |                                                   |
| <1 year                                                      | 1023; 4064                                 | 0.5; 0.5                                | 1.09 (1.01 to 1.17)                               | 2691; 12409                      | 0.5; 0.5                                | 0.98 (0.94 to 1.03)                               |
| 1-2 years                                                    | 1444; 5003                                 | 2.0; 1.9                                | 1.27 (1.19 to 1.35) <sup>β</sup>                  | 2302; 9617                       | 1.9; 1.9                                | 1.08 (1.03 to 1.14) <sup>a</sup>                  |

|                            |            |            |                                  |             |            |                                  |
|----------------------------|------------|------------|----------------------------------|-------------|------------|----------------------------------|
| 3-4 years                  | 1307; 4164 | 4.0; 4.0   | 1.42 (1.33 to 1.51) <sup>β</sup> | 1517; 6203  | 4.0; 3.9   | 1.10 (1.04 to 1.17) <sup>α</sup> |
| 5-9 years                  | 2863; 8004 | 7.4; 7.3   | 1.65 (1.57 to 1.73) <sup>β</sup> | 2111; 8212  | 7.0; 7.0   | 1.15 (1.09 to 1.21) <sup>β</sup> |
| 10+ years                  | 1552; 3394 | 13.0; 12.9 | 2.07 (1.94 to 2.20) <sup>β</sup> | 432; 1512   | 11.6; 11.8 | 1.31 (1.17 to 1.46) <sup>β</sup> |
| <b>Medroxyprogesterone</b> |            |            |                                  |             |            |                                  |
| <1 year                    | 624; 1924  | 0.5; 0.4   | 1.18 (1.07 to 1.29) <sup>β</sup> | 1559; 6245  | 0.4; 0.4   | 0.99 (0.94 to 1.06)              |
| 1-2 years                  | 570; 1620  | 1.9; 1.9   | 1.33 (1.20 to 1.47) <sup>β</sup> | 835; 3022   | 1.9; 1.9   | 1.10 (1.01 to 1.19)              |
| 3-4 years                  | 406; 1065  | 3.9; 4.0   | 1.54 (1.37 to 1.73) <sup>β</sup> | 404; 1439   | 3.9; 3.9   | 1.16 (1.04 to 1.31) <sup>α</sup> |
| 5-9 years                  | 447; 1101  | 7.0; 6.7   | 1.73 (1.54 to 1.94) <sup>β</sup> | 244; 960    | 6.4; 6.4   | 1.07 (0.92 to 1.23)              |
| 10+ years                  | 107; 174   | 12.0; 12.2 | 2.60 (2.02 to 3.36) <sup>β</sup> | n/d         | n/d        | n/d                              |
| <b>Levonorgestrel</b>      |            |            |                                  |             |            |                                  |
| <1 year                    | 541; 1767  | 0.4; 0.5   | 1.15 (1.04 to 1.28) <sup>α</sup> | 2840; 11725 | 0.4; 0.4   | 0.99 (0.94 to 1.03)              |
| 1-2 years                  | 532; 1554  | 2.0; 1.9   | 1.31 (1.18 to 1.45) <sup>β</sup> | 1897; 7237  | 1.9; 1.9   | 1.04 (0.98 to 1.10)              |
| 3-4 years                  | 413; 1203  | 4.0; 4.0   | 1.40 (1.25 to 1.57) <sup>β</sup> | 1044; 3702  | 3.9; 3.9   | 1.11 (1.03 to 1.19) <sup>α</sup> |
| 5-9 years                  | 731; 1826  | 7.2; 7.2   | 1.71 (1.56 to 1.87) <sup>β</sup> | 1235; 4006  | 7.3; 7.2   | 1.23 (1.15 to 1.31) <sup>β</sup> |
| 10+ years                  | 245; 500   | 12.4; 12.5 | 2.20 (1.88 to 2.57) <sup>β</sup> | n/d         | n/d        | n/d                              |
| <b>Norethisterone</b>      |            |            |                                  |             |            |                                  |
| <1 year                    | 1068; 4133 | 0.5; 0.4   | 0.97 (0.90 to 1.04)              | 2998; 12348 | 0.4; 0.4   | 1.01 (0.97 to 1.06)              |
| 1-2 years                  | 1047; 3404 | 1.9; 1.9   | 1.22 (1.13 to 1.31) <sup>β</sup> | 1591; 6303  | 1.8; 1.8   | 1.05 (0.99 to 1.12)              |
| 3-4 years                  | 742; 2218  | 4.0; 3.9   | 1.43 (1.31 to 1.56) <sup>β</sup> | 799; 3025   | 3.9; 3.9   | 1.12 (1.03 to 1.21) <sup>α</sup> |
| 5-9 years                  | 1136; 2752 | 7.2; 7.0   | 1.81 (1.68 to 1.95) <sup>β</sup> | 757; 2753   | 7.0; 7.0   | 1.18 (1.09 to 1.29) <sup>β</sup> |
| 10+ years                  | 351; 685   | 12.6; 12.3 | 2.21 (1.93 to 2.52) <sup>β</sup> | n/d         | n/d        | n/d                              |
| <b>Dydrogesterone</b>      |            |            |                                  |             |            |                                  |
| <1 year                    | 287; 934   | 0.4; 0.4   | 1.10 (0.96 to 1.26)              | 761; 3023   | 0.4; 0.4   | 0.93 (0.85 to 1.01)              |
| 1-2 years                  | 172; 688   | 1.9; 1.8   | 0.95 (0.80 to 1.12)              | 318; 1250   | 1.8; 1.8   | 0.94 (0.83 to 1.07)              |
| 3-4 years                  | 83; 302    | 4.0; 3.9   | 1.11 (0.86 to 1.42)              | 91; 444     | 3.7; 3.8   | 0.78 (0.62 to 0.98)              |
| 5-9 years                  | 95; 338    | 6.9; 6.8   | 1.15 (0.91 to 1.45)              | 63; 227     | 6.7; 6.9   | 1.12 (0.84 to 1.51)              |
| 10+ years                  | 25; 63     | 11.4; 11.7 | 1.54 (0.96 to 2.47)              | n/d         | n/d        | n/d                              |
| <b>TIBOLONE</b>            |            |            |                                  |             |            |                                  |

|           |           |            |                                  |            |          |                     |
|-----------|-----------|------------|----------------------------------|------------|----------|---------------------|
| <1 year   | 367; 1407 | 0.4; 0.4   | 0.92 (0.82 to 1.04)              | 1206; 4997 | 0.4; 0.4 | 0.98 (0.91 to 1.04) |
| 1-2 years | 255; 858  | 1.9; 1.9   | 1.13 (0.98 to 1.30)              | 407; 1680  | 1.8; 1.8 | 0.99 (0.88 to 1.10) |
| 3-4 years | 166; 582  | 4.0; 3.9   | 1.19 (1.00 to 1.42)              | 168; 695   | 3.9; 3.9 | 1.00 (0.84 to 1.19) |
| 5-9 years | 250; 837  | 7.2; 7.1   | 1.28 (1.10 to 1.47) <sup>β</sup> | 149; 650   | 7.2; 7.4 | 1.02 (0.85 to 1.22) |
| 10+ years | 76; 233   | 12.1; 12.7 | 1.44 (1.11 to 1.88) <sup>α</sup> | n/d        | n/d      | n/d                 |

<sup>#</sup>Odds ratios are with reference to never-users and based on cases and controls matched by age and practice and adjusted for smoking status, body mass index, family history of cancer, medical conditions and events, other medications and contraceptive drugs; <sup>α</sup> P-value<0.01;

<sup>β</sup> P-value<0.001; n/d – not enough data, few observations added to previous category

eTable 14 All cases and controls aged 55 and older: Duration of use for different hormones of HRT and tibolone in women with recent (between >1 and <5 years before the index date) and past (5 years or more before the index date) exposures, combined analysis

|                                                              | Recent exposure (between >1 and <5 years ) |                                         |                                                   | Past exposures (5 years or more) |                                         |                                                   |
|--------------------------------------------------------------|--------------------------------------------|-----------------------------------------|---------------------------------------------------|----------------------------------|-----------------------------------------|---------------------------------------------------|
| Total number of women:<br>79951 cases and 371889<br>controls | N of cases;<br>controls                    | Mean<br>duration:<br>cases;<br>controls | Combined odds ratio#<br>(95% confidence interval) | N of cases;<br>controls          | Mean<br>duration:<br>cases;<br>controls | Combined odds ratio#<br>(95% confidence interval) |
| <b>OESTROGEN ONLY</b>                                        |                                            |                                         |                                                   |                                  |                                         |                                                   |
| <1 year                                                      | 415; 1885                                  | 0.5; 0.5                                | 1.12 (1.00 to 1.25)                               | 1156; 5458                       | 0.4; 0.4                                | 1.07 (1.00 to 1.15)                               |
| 1-4 years                                                    | 1464; 6580                                 | 3.0; 3.0                                | 1.17 (1.10 to 1.24) <sup>β</sup>                  | 1446; 7392                       | 2.7; 2.7                                | 0.99 (0.94 to 1.06)                               |
| 5+ years                                                     | 2223; 10208                                | 9.3; 9.2                                | 1.17 (1.11 to 1.23) <sup>β</sup>                  | 1153; 5924                       | 8.1; 8.1                                | 1.00 (0.93 to 1.07)                               |
| <b>Conjugated equine oestrogen</b>                           |                                            |                                         |                                                   |                                  |                                         |                                                   |
| <1 year                                                      | 187; 882                                   | 0.5; 0.5                                | 1.03 (0.87 to 1.21)                               | 946; 4796                        | 0.4; 0.4                                | 0.99 (0.92 to 1.06)                               |
| 1-4 years                                                    | 630; 2872                                  | 3.1; 3.0                                | 1.11 (1.02 to 1.22)                               | 881; 4337                        | 2.6; 2.6                                | 1.00 (0.93 to 1.08)                               |
| 5+ years                                                     | 946; 4443                                  | 8.9; 9.1                                | 1.12 (1.04 to 1.21) <sup>α</sup>                  | 559; 2938                        | 8.0; 8.0                                | 0.96 (0.87 to 1.05)                               |
| <b>Estradiol</b>                                             |                                            |                                         |                                                   |                                  |                                         |                                                   |
| <1 year                                                      | 406; 1864                                  | 0.4; 0.4                                | 1.07 (0.96 to 1.20)                               | 1003; 5088                       | 0.4; 0.4                                | 0.97 (0.90 to 1.04)                               |
| 1-4 years                                                    | 994; 4562                                  | 2.9; 2.9                                | 1.11 (1.03 to 1.19) <sup>α</sup>                  | 1046; 5316                       | 2.6; 2.6                                | 0.98 (0.92 to 1.05)                               |
| 5+ years                                                     | 1170; 5183                                 | 9.2; 9.0                                | 1.18 (1.10 to 1.26) <sup>β</sup>                  | 587; 2923                        | 7.8; 7.8                                | 1.00 (0.91 to 1.10)                               |
| <b>OESTROGEN COMBINED with</b>                               |                                            |                                         |                                                   |                                  |                                         |                                                   |
| <b>any progestogen</b>                                       |                                            |                                         |                                                   |                                  |                                         |                                                   |
| <1 year                                                      | 1059; 4569                                 | 0.5; 0.5                                | 1.23 (1.14 to 1.32) <sup>β</sup>                  | 3244; 16846                      | 0.5; 0.5                                | 0.98 (0.94 to 1.02)                               |
| 1-4 years                                                    | 4102; 14319                                | 3.1; 3.0                                | 1.52 (1.47 to 1.58) <sup>β</sup>                  | 4489; 20994                      | 2.7; 2.7                                | 1.07 (1.04 to 1.11) <sup>β</sup>                  |
| 5+ years                                                     | 5936; 16913                                | 9.0; 8.6                                | 1.88 (1.82 to 1.94) <sup>β</sup>                  | 2832; 12163                      | 7.8; 7.7                                | 1.17 (1.12 to 1.23) <sup>β</sup>                  |
| <b>Medroxyprogesterone</b>                                   |                                            |                                         |                                                   |                                  |                                         |                                                   |
| <1 year                                                      | 879; 3097                                  | 0.5; 0.4                                | 1.12 (1.04 to 1.22) <sup>α</sup>                  | 1833; 8267                       | 0.4; 0.4                                | 0.98 (0.93 to 1.04)                               |
| 1-4 years                                                    | 1607; 4895                                 | 2.7; 2.7                                | 1.45 (1.36 to 1.54) <sup>β</sup>                  | 1403; 5824                       | 2.5; 2.5                                | 1.08 (1.01 to 1.15)                               |
| 5+ years                                                     | 724; 1816                                  | 7.7; 7.3                                | 1.91 (1.75 to 2.10) <sup>β</sup>                  | 273; 1192                        | 6.4; 6.4                                | 1.07 (0.94 to 1.23)                               |
| <b>Levonorgestrel</b>                                        |                                            |                                         |                                                   |                                  |                                         |                                                   |



|                       |            |          |                                  |             |          |                                  |
|-----------------------|------------|----------|----------------------------------|-------------|----------|----------------------------------|
| <1 year               | 543; 2000  | 0.5; 0.5 | 1.15 (1.04 to 1.27) <sup>a</sup> | 3427; 15869 | 0.4; 0.4 | 0.98 (0.94 to 1.02)              |
| 1-4 years             | 1390; 4347 | 3.0; 2.9 | 1.47 (1.38 to 1.57) <sup>β</sup> | 3612; 14685 | 2.6; 2.5 | 1.08 (1.03 to 1.12) <sup>β</sup> |
| 5+ years              | 1368; 3635 | 8.2; 8.0 | 1.86 (1.74 to 1.99) <sup>β</sup> | 1397; 4996  | 7.2; 7.2 | 1.24 (1.16 to 1.32) <sup>β</sup> |
| <b>Norethisterone</b> |            |          |                                  |             |          |                                  |
| <1 year               | 1320; 5027 | 0.5; 0.5 | 1.14 (1.07 to 1.22) <sup>β</sup> | 3533; 16186 | 0.4; 0.4 | 1.02 (0.98 to 1.06)              |
| 1-4 years             | 2612; 8741 | 2.9; 2.8 | 1.42 (1.35 to 1.49) <sup>β</sup> | 2790; 12357 | 2.5; 2.5 | 1.06 (1.01 to 1.11)              |
| 5+ years              | 1979; 5039 | 8.1; 7.8 | 2.00 (1.89 to 2.11) <sup>β</sup> | 831; 3496   | 7.0; 7.0 | 1.15 (1.06 to 1.24) <sup>β</sup> |
| <b>Dydrogesterone</b> |            |          |                                  |             |          |                                  |
| <1 year               | 303; 1022  | 0.4; 0.4 | 1.11 (0.97 to 1.27)              | 883; 3803   | 0.4; 0.4 | 0.96 (0.89 to 1.04)              |
| 1-4 years             | 307; 1316  | 2.7; 2.6 | 0.98 (0.86 to 1.12)              | 467; 2149   | 2.2; 2.3 | 0.92 (0.83 to 1.02)              |
| 5+ years              | 137; 493   | 7.8; 7.6 | 1.28 (1.06 to 1.56)              | 67; 288     | 6.7; 6.8 | 1.08 (0.82 to 1.42)              |
| <b>TIBOLONE</b>       |            |          |                                  |             |          |                                  |
| <1 year               | 536; 2263  | 0.4; 0.4 | 0.94 (0.86 to 1.04)              | 1480; 6710  | 0.4; 0.4 | 0.99 (0.93 to 1.05)              |
| 1-4 years             | 718; 2777  | 2.7; 2.7 | 1.15 (1.05 to 1.25) <sup>a</sup> | 706; 3230   | 2.4; 2.4 | 0.99 (0.91 to 1.07)              |
| 5+ years              | 448; 1630  | 8.1; 8.0 | 1.34 (1.21 to 1.49) <sup>β</sup> | 172; 821    | 7.2; 7.3 | 1.02 (0.86 to 1.20)              |

<sup>a</sup>Odds ratios are with reference to never-users and based on cases and controls matched by age and practice and adjusted for smoking status, body mass index, family history of cancer, medical conditions and events, other medications and contraceptive drugs; <sup>a</sup> P-value<0.01;

<sup>β</sup> P-value<0.001; n/d – not enough data, few observations added to previous category

eTable 15 All cases and controls: Years of use since the first prescription, for different hormones of HRT, by database

|                                    | QResearch            |                                                            | CPRD                 |                                                            | Combined analysis                             |         |
|------------------------------------|----------------------|------------------------------------------------------------|----------------------|------------------------------------------------------------|-----------------------------------------------|---------|
|                                    | N of cases; controls | Adjusted odds ratio <sup>#</sup> (95% confidence interval) | N of cases; controls | Adjusted odds ratio <sup>#</sup> (95% confidence interval) | Combined odds ratio (95% confidence interval) | P-value |
| <b>HRT</b>                         |                      |                                                            |                      |                                                            |                                               |         |
| <1 year                            | 3274; 15577          | 1.03 (0.99 to 1.07)                                        | 2469; 12221          | 1.07 (1.02 to 1.12) <sup>a</sup>                           | 1.05 (1.02 to 1.08)                           | 0.003   |
| 1-2 years                          | 3437; 15200          | 1.11 (1.06 to 1.15) <sup>β</sup>                           | 2390; 10411          | 1.21 (1.15 to 1.27) <sup>β</sup>                           | 1.15 (1.11 to 1.18)                           | <0.001  |
| 3-4 years                          | 3400; 14103          | 1.20 (1.15 to 1.25) <sup>β</sup>                           | 2064; 9150           | 1.21 (1.15 to 1.27) <sup>β</sup>                           | 1.20 (1.16 to 1.24)                           | <0.001  |
| 5-9 years                          | 6866; 26746          | 1.30 (1.26 to 1.35) <sup>β</sup>                           | 4030; 17502          | 1.28 (1.23 to 1.33) <sup>β</sup>                           | 1.29 (1.26 to 1.33)                           | <0.001  |
| 10+ years                          | 3517; 11950          | 1.53 (1.47 to 1.60) <sup>β</sup>                           | 2256; 9531           | 1.37 (1.30 to 1.44) <sup>β</sup>                           | 1.47 (1.42 to 1.52)                           | <0.001  |
| <b>OESTROGEN ONLY</b>              |                      |                                                            |                      |                                                            |                                               |         |
| <1 year                            | 768; 3497            | 1.10 (1.01 to 1.19)                                        | 668; 3194            | 1.09 (0.99 to 1.19)                                        | 1.09 (1.03 to 1.16)                           | 0.004   |
| 1-2 years                          | 741; 3705            | 1.01 (0.93 to 1.09)                                        | 600; 2825            | 1.08 (0.99 to 1.19)                                        | 1.04 (0.98 to 1.11)                           | 0.2     |
| 3-4 years                          | 826; 3848            | 1.09 (1.01 to 1.18)                                        | 553; 2726            | 1.06 (0.96 to 1.17)                                        | 1.08 (1.02 to 1.15)                           | 0.01    |
| 5-9 years                          | 1772; 8499           | 1.08 (1.02 to 1.14)                                        | 1181; 5947           | 1.08 (1.01 to 1.16)                                        | 1.08 (1.03 to 1.13)                           | <0.001  |
| 10+ years                          | 1019; 4753           | 1.13 (1.05 to 1.21) <sup>a</sup>                           | 732; 3805            | 1.11 (1.01 to 1.21)                                        | 1.12 (1.06 to 1.18)                           | <0.001  |
| <b>Conjugated equine oestrogen</b> |                      |                                                            |                      |                                                            |                                               |         |
| <1 year                            | 597; 3045            | 0.95 (0.87 to 1.05)                                        | 491; 2606            | 0.97 (0.87 to 1.07)                                        | 0.96 (0.90 to 1.03)                           | 0.2     |
| 1-2 years                          | 446; 2363            | 0.93 (0.83 to 1.03)                                        | 347; 1713            | 1.02 (0.91 to 1.16)                                        | 0.97 (0.89 to 1.05)                           | 0.4     |
| 3-4 years                          | 436; 1935            | 1.11 (1.00 to 1.24)                                        | 278; 1329            | 1.08 (0.95 to 1.24)                                        | 1.10 (1.01 to 1.20)                           | 0.03    |
| 5-9 years                          | 798; 3965            | 1.01 (0.94 to 1.10)                                        | 549; 2558            | 1.13 (1.02 to 1.25)                                        | 1.06 (1.00 to 1.13)                           | 0.07    |
| 10+ years                          | 403; 1943            | 1.06 (0.95 to 1.18)                                        | 263; 1416            | 1.04 (0.90 to 1.19)                                        | 1.05 (0.96 to 1.14)                           | 0.3     |
| <b>Estradiol</b>                   |                      |                                                            |                      |                                                            |                                               |         |
| <1 year                            | 685; 3400            | 0.99 (0.91 to 1.08)                                        | 628; 3146            | 1.01 (0.92 to 1.11)                                        | 1.00 (0.94 to 1.06)                           | 0.9     |
| 1-2 years                          | 595; 2903            | 1.01 (0.92 to 1.10)                                        | 493; 2270            | 1.09 (0.98 to 1.21)                                        | 1.04 (0.97 to 1.12)                           | 0.2     |
| 3-4 years                          | 535; 2551            | 1.05 (0.95 to 1.15)                                        | 367; 1963            | 0.95 (0.85 to 1.07)                                        | 1.01 (0.93 to 1.08)                           | 0.9     |
| 5-9 years                          | 1008; 4801           | 1.05 (0.98 to 1.13)                                        | 711; 3591            | 1.05 (0.96 to 1.14)                                        | 1.05 (0.99 to 1.11)                           | 0.09    |
| 10+ years                          | 550; 2321            | 1.21 (1.10 to 1.34) <sup>β</sup>                           | 377; 1981            | 1.06 (0.94 to 1.19)                                        | 1.15 (1.07 to 1.24)                           | <0.001  |

|                                |             |                                  |             |                                  |                     |        |
|--------------------------------|-------------|----------------------------------|-------------|----------------------------------|---------------------|--------|
| <b>OESTROGEN COMBINED with</b> |             |                                  |             |                                  |                     |        |
| <b>any progestogen</b>         |             |                                  |             |                                  |                     |        |
| <1 year                        | 2510; 12109 | 1.01 (0.96 to 1.06)              | 1801; 9027  | 1.06 (1.00 to 1.12)              | 1.03 (0.99 to 1.07) | 0.1    |
| 1-2 years                      | 2696; 11501 | 1.13 (1.08 to 1.18) <sup>β</sup> | 1790; 7586  | 1.25 (1.18 to 1.32) <sup>β</sup> | 1.18 (1.14 to 1.22) | <0.001 |
| 3-4 years                      | 2574; 10258 | 1.23 (1.17 to 1.29) <sup>β</sup> | 1511; 6424  | 1.26 (1.18 to 1.33) <sup>β</sup> | 1.24 (1.19 to 1.28) | <0.001 |
| 5-9 years                      | 5096; 18248 | 1.39 (1.34 to 1.44) <sup>β</sup> | 2849; 11555 | 1.36 (1.29 to 1.42) <sup>β</sup> | 1.38 (1.34 to 1.42) | <0.001 |
| 10+ years                      | 2498; 7198  | 1.76 (1.68 to 1.85) <sup>β</sup> | 1524; 5726  | 1.50 (1.41 to 1.59) <sup>β</sup> | 1.65 (1.59 to 1.72) | <0.001 |
| <b>Medroxyprogesterone</b>     |             |                                  |             |                                  |                     |        |
| <1 year                        | 1748; 7152  | 1.02 (0.96 to 1.08)              | 1051; 4586  | 1.05 (0.98 to 1.13)              | 1.03 (0.99 to 1.08) | 0.2    |
| 1-2 years                      | 1190; 4482  | 1.10 (1.03 to 1.18) <sup>α</sup> | 708; 2662   | 1.23 (1.13 to 1.35) <sup>β</sup> | 1.15 (1.09 to 1.21) | <0.001 |
| 3-4 years                      | 810; 2700   | 1.28 (1.18 to 1.38) <sup>β</sup> | 435; 1626   | 1.25 (1.12 to 1.39) <sup>β</sup> | 1.27 (1.19 to 1.35) | <0.001 |
| 5-9 years                      | 758; 2501   | 1.30 (1.20 to 1.42) <sup>β</sup> | 395; 1451   | 1.30 (1.16 to 1.46) <sup>β</sup> | 1.30 (1.22 to 1.39) | <0.001 |
| 10+ years                      | 184; 318    | 2.39 (1.98 to 2.89) <sup>β</sup> | 57; 205     | 1.31 (0.97 to 1.77)              | 2.02 (1.72 to 2.37) | <0.001 |
| <b>Levonorgestrel</b>          |             |                                  |             |                                  |                     |        |
| <1 year                        | 2443; 10414 | 1.03 (0.98 to 1.08)              | 1607; 7599  | 1.02 (0.96 to 1.08)              | 1.02 (0.99 to 1.06) | 0.2    |
| 1-2 years                      | 2072; 7827  | 1.15 (1.09 to 1.21) <sup>β</sup> | 1104; 4881  | 1.07 (1.00 to 1.15)              | 1.12 (1.08 to 1.17) | <0.001 |
| 3-4 years                      | 1472; 5507  | 1.16 (1.10 to 1.24) <sup>β</sup> | 849; 3248   | 1.26 (1.16 to 1.36) <sup>β</sup> | 1.20 (1.14 to 1.26) | <0.001 |
| 5-9 years                      | 2003; 6307  | 1.41 (1.34 to 1.49) <sup>β</sup> | 1102; 4294  | 1.26 (1.17 to 1.35) <sup>β</sup> | 1.35 (1.29 to 1.41) | <0.001 |
| 10+ years                      | 484; 1349   | 1.60 (1.43 to 1.78) <sup>β</sup> | 304; 1027   | 1.49 (1.30 to 1.70) <sup>β</sup> | 1.55 (1.43 to 1.69) | <0.001 |
| <b>Norethisterone</b>          |             |                                  |             |                                  |                     |        |
| <1 year                        | 2805; 12073 | 1.02 (0.97 to 1.06)              | 1993; 9319  | 1.04 (0.99 to 1.10)              | 1.03 (0.99 to 1.06) | 0.1    |
| 1-2 years                      | 2034; 8278  | 1.09 (1.04 to 1.15) <sup>β</sup> | 1330; 5369  | 1.21 (1.14 to 1.29) <sup>β</sup> | 1.14 (1.09 to 1.19) | <0.001 |
| 3-4 years                      | 1490; 5518  | 1.21 (1.14 to 1.29) <sup>β</sup> | 922; 3686   | 1.25 (1.16 to 1.35) <sup>β</sup> | 1.23 (1.17 to 1.29) | <0.001 |
| 5-9 years                      | 2153; 7378  | 1.33 (1.26 to 1.40) <sup>β</sup> | 1110; 4416  | 1.28 (1.20 to 1.38) <sup>β</sup> | 1.31 (1.26 to 1.37) | <0.001 |
| 10+ years                      | 669; 1644   | 1.84 (1.68 to 2.02) <sup>β</sup> | 328; 1141   | 1.47 (1.29 to 1.67) <sup>β</sup> | 1.70 (1.58 to 1.83) | <0.001 |
| <b>Dydrogesterone</b>          |             |                                  |             |                                  |                     |        |
| <1 year                        | 850; 3401   | 0.97 (0.90 to 1.05)              | 473; 2156   | 0.96 (0.86 to 1.06)              | 0.97 (0.91 to 1.03) | 0.3    |
| 1-2 years                      | 432; 1778   | 0.96 (0.86 to 1.07)              | 215; 1110   | 0.86 (0.74 to 1.00)              | 0.92 (0.85 to 1.01) | 0.08   |
| 3-4 years                      | 209; 962    | 0.86 (0.74 to 1.00)              | 102; 503    | 0.94 (0.76 to 1.17)              | 0.88 (0.78 to 1.00) | 0.05   |

|                 |            |                                  |           |                     |                     |       |
|-----------------|------------|----------------------------------|-----------|---------------------|---------------------|-------|
| 5-9 years       | 196; 740   | 1.07 (0.91 to 1.26)              | 77; 404   | 0.91 (0.71 to 1.17) | 1.02 (0.89 to 1.17) | 0.8   |
| 10+ years       | 42; 121    | 1.26 (0.88 to 1.82)              | 18; 71    | 1.15 (0.68 to 1.95) | 1.23 (0.91 to 1.65) | 0.2   |
| <b>TIBOLONE</b> |            |                                  |           |                     |                     |       |
| <1 year         | 1166; 4910 | 0.98 (0.91 to 1.04)              | 837; 4064 | 0.93 (0.86 to 1.01) | 0.96 (0.91 to 1.01) | 0.1   |
| 1-2 years       | 558; 2356  | 0.98 (0.90 to 1.08)              | 390; 1753 | 0.99 (0.88 to 1.10) | 0.99 (0.92 to 1.06) | 0.7   |
| 3-4 years       | 288; 1368  | 0.90 (0.79 to 1.03)              | 227; 904  | 1.16 (1.00 to 1.35) | 1.01 (0.91 to 1.11) | 0.9   |
| 5-9 years       | 386; 1540  | 1.09 (0.97 to 1.22)              | 270; 1153 | 1.12 (0.98 to 1.28) | 1.10 (1.01 to 1.20) | 0.03  |
| 10+ years       | 117; 388   | 1.37 (1.11 to 1.70) <sup>a</sup> | 69; 291   | 1.16 (0.89 to 1.51) | 1.29 (1.09 to 1.52) | 0.003 |

<sup>#</sup>Odds ratios are with reference to never-users and based on cases and controls matched by age and practice and adjusted for smoking status, body mass index, family history of cancer, medical conditions and events, other medications and contraceptive drugs.

<sup>a</sup> P-value<0.01; <sup>β</sup> P-value<0.001

eTable 16 Comparison our results with the recent meta-analysis (Lancet 2019)

| Our study<br>Duration for recent users (between >1 and <5 years ) in women aged 55 and older |                 |                            |                     | Meta-analysis (Lancet 2019)<br>Duration for current users (within 5 years) |                 |                            |                        |
|----------------------------------------------------------------------------------------------|-----------------|----------------------------|---------------------|----------------------------------------------------------------------------|-----------------|----------------------------|------------------------|
|                                                                                              | Number of cases | Mean use in years in cases | Odds Ratio (95% CI) |                                                                            | Number of cases | Mean use in years in cases | Relative Risk (95% CI) |
| <b>Oestrogen only</b>                                                                        |                 |                            |                     | <b>Oestrogen only</b>                                                      |                 |                            |                        |
| <1 year                                                                                      | 415             | 0.5                        | 1.08 (0.90-1.29)    | <1 year                                                                    | 109             | <1.0                       | 1.08 (0.86-1.35)       |
| 1-4 years                                                                                    | 1464            | 3.0                        | 1.27 (1.15-1.40)    | 1-4 years                                                                  | 1150            | 2.8                        | 1.17 (1.10-1.26)       |
| 5-9 years                                                                                    | 1469            | 7.3                        | 1.16 (1.09-1.23)    | 5-9 years                                                                  | 2391            | 7.0                        | 1.22 (1.17-1.28)       |
| 10+                                                                                          | 754             | 13.1                       | 1.20 (1.11-1.31)    | 10-14 years                                                                | 2478            | 11.7                       | 1.43 (1.37-1.50)       |
|                                                                                              |                 |                            |                     | 15+                                                                        | 2183            | 20.1                       | 1.58 (1.51-1.66)       |
| <b>Oestrogen and progestogen</b>                                                             |                 |                            |                     | <b>Oestrogen and progestogen</b>                                           |                 |                            |                        |
| <1 year                                                                                      | 1059            | 0.5                        | 1.13 (0.87-1.47)    | <1 year                                                                    | 189             | <1.0                       | 1.20 (1.01-1.43)       |
| 1-4 years                                                                                    | 4102            | 3.1                        | 1.37 (1.14-1.64)    | 1-4 years                                                                  | 2230            | 2.8                        | 1.60 (1.52-1.69)       |
| 5-9 years                                                                                    | 4124            | 7.2                        | 1.78 (1.72-1.86)    | 5-9 years                                                                  | 4968            | 7.0                        | 1.97 (1.90-2.04)       |
| 10+                                                                                          | 1812            | 12.9                       | 2.14 (2.02-2.27)    | 10-14 years                                                                | 3350            | 11.7                       | 2.26 (2.16-2.36)       |
|                                                                                              |                 |                            |                     | 15+                                                                        | 1424            | 20.1                       | 2.51 (2.35-2.68)       |
| <b>Main types of hormones 5+ years of recent use</b>                                         |                 |                            |                     | <b>Main types of hormones 5-14 years of current use</b>                    |                 |                            |                        |
| Equine oestrogen                                                                             | 946             | 8.9                        | 1.12 (1.04-1.21)    | Equine oestrogen                                                           | 1910            | 9                          | 1.32 (1.25-1.39)       |
| Estradiol                                                                                    | 1170            | 9.2                        | 1.18 (1.10-1.26)    | Estradiol                                                                  | 1563            | 9                          | 1.38 (1.30-1.46)       |
| Levonorgestrel                                                                               | 1368            | 8.2                        | 1.86 (1.74-1.99)    | Levonorgestrel                                                             | 1735            | 9                          | 2.12 (1.99-2.25)       |
| Norethisterone                                                                               | 1979            | 8.1                        | 2.00 (1.89-2.11)    | Norethisterone                                                             | 2642            | 9                          | 2.20 (2.09-2.32)       |
| Medroxyprogesterone                                                                          | 724             | 7.7                        | 1.91 (1.75-2.10)    | Medroxyprogesterone                                                        | 2012            | 9                          | 2.07 (1.96-2.19)       |
| Dydrogesterone                                                                               | 137             | 7.8                        | 1.28 (1.06-1.56)    | Dydrogesterone                                                             | 162             | 9                          | 1.41 (1.17-1.71)       |
| Tibolone                                                                                     | 448             | 8.1                        | 1.34 (1.21-1.49)    | Tibolone                                                                   | 680             | 9                          | 1.57 (1.43-1.72)       |
